# Supplementary material for: Extending the RIGHT statement for reporting adapted practice guidelines in healthcare: the RIGHT-Ad@pt Checklist protocol
Source: PubMed Central journal article supplement — BMJ Open. 2019 Sep 24;9(9):e031767. doi: 10.1136/bmjopen-2019-031767 (PMC6773334; doi:10.1136/bmjopen-2019-031767), 2019-09-24
Supplement: bmjopen-2019-031767.draft_revisions.pdf [file bmjopen-2019-031767.draft_revisions.pdf]

# BMJ Open

BMJ Open is committed to open peer review. As part of this commitment we make the peer review history of every article we publish publicly available.

When an article is published we post the peer reviewers' comments and the authors' responses online. We also post the versions of the paper that were used during peer review. These are the versions that the peer review comments apply to.

The versions of the paper that follow are the versions that were submitted during the peer review process. They are not the versions of record or the final published versions. They should not be cited or distributed as the published version of this manuscript.

BMJ Open is an open access journal and the full, final, typeset and author-corrected version of record of the manuscript is available on our site with no access controls, subscription charges or pay-per-view fees (<http://bmjopen.bmj.com>).

If you have any questions on BMJ Open's open peer review process please email [info.bmjopen@bmj.com](mailto:info.bmjopen@bmj.com)

# BMJ Open

## Extending the RIGHT statement for Reporting Adapted Practice Guidelines in Health Care: the RIGHT-Ad@pt Checklist protocol

|                               |                                                                                                                                                                                                                                                                                                                                                                                                                                                                                                                                                                                                                                                                                                                                                                                                                                                                                                                                                                                                                                                                                                                                                                                                                                                                                                                                                                                                                                                                                                                                                                                                     |
|-------------------------------|-----------------------------------------------------------------------------------------------------------------------------------------------------------------------------------------------------------------------------------------------------------------------------------------------------------------------------------------------------------------------------------------------------------------------------------------------------------------------------------------------------------------------------------------------------------------------------------------------------------------------------------------------------------------------------------------------------------------------------------------------------------------------------------------------------------------------------------------------------------------------------------------------------------------------------------------------------------------------------------------------------------------------------------------------------------------------------------------------------------------------------------------------------------------------------------------------------------------------------------------------------------------------------------------------------------------------------------------------------------------------------------------------------------------------------------------------------------------------------------------------------------------------------------------------------------------------------------------------------|
| Journal:                      | <i>BMJ Open</i>                                                                                                                                                                                                                                                                                                                                                                                                                                                                                                                                                                                                                                                                                                                                                                                                                                                                                                                                                                                                                                                                                                                                                                                                                                                                                                                                                                                                                                                                                                                                                                                     |
| Manuscript ID                 | bmjopen-2019-031767                                                                                                                                                                                                                                                                                                                                                                                                                                                                                                                                                                                                                                                                                                                                                                                                                                                                                                                                                                                                                                                                                                                                                                                                                                                                                                                                                                                                                                                                                                                                                                                 |
| Article Type:                 | Protocol                                                                                                                                                                                                                                                                                                                                                                                                                                                                                                                                                                                                                                                                                                                                                                                                                                                                                                                                                                                                                                                                                                                                                                                                                                                                                                                                                                                                                                                                                                                                                                                            |
| Date Submitted by the Author: | 17-May-2019                                                                                                                                                                                                                                                                                                                                                                                                                                                                                                                                                                                                                                                                                                                                                                                                                                                                                                                                                                                                                                                                                                                                                                                                                                                                                                                                                                                                                                                                                                                                                                                         |
| Complete List of Authors:     | <p>SONG, YANG; Iberoamerican Cochrane Centre - Biomedical Research Institute Sant Pau (IIB Sant Pau)<br/>         Darzi, Andrea; American University of Beirut, AUB GRADE Center<br/>         Ballesteros, Monica; Hospital Universitario Vall d'Hebron<br/>         Martínez García, Laura; Iberoamerican Cochrane Centre - Biomedical Research Institute Sant Pau (IIB Sant Pau)<br/>         Alonso-Coello, Pablo; Iberoamerican Cochrane Centre - Biomedical Research Institute Sant Pau (IIB Sant Pau); CIBER de Epidemiología y Salud Pública (CIBERESP)<br/>         Arayssi, Thurayya; Weill Cornell Medicine-Qatar<br/>         Bhaumik, Soumyadeep; The George Institute for Global Health<br/>         Chen, Yaolong ; Lanzhou University; WHO Collaborating Centre for Guideline Implementation and Knowledge Translation<br/>         Cluzeau, Françoise; Imperial College London, School of Public Health, Faculty of Medicine<br/>         Gherzi, Davina; National Health and Medical Research Council<br/>         Fuentes, Paulina; Universidad de Antofagasta, Facultad de Medicina y Odontología<br/>         Langlois, Etienne V.; World Health Organization, Alliance for Health Policy and Systems Research<br/>         Schünemann, Holger; McMaster University, Department of Health Research Methods, Evidence, and Impact<br/>         Vernooij, Robin W.M. ; Netherlands Comprehensive Cancer Organisation (IKNL), 14. Department of Research<br/>         Akl, Elie; American University of Beirut; American University of Beirut, Department of Internal Medicine</p> |
| Keywords:                     | Evidence-based medicine, guideline adaptation, guidelines as topic, practice guideline, quality, reporting standards                                                                                                                                                                                                                                                                                                                                                                                                                                                                                                                                                                                                                                                                                                                                                                                                                                                                                                                                                                                                                                                                                                                                                                                                                                                                                                                                                                                                                                                                                |
|                               |                                                                                                                                                                                                                                                                                                                                                                                                                                                                                                                                                                                                                                                                                                                                                                                                                                                                                                                                                                                                                                                                                                                                                                                                                                                                                                                                                                                                                                                                                                                                                                                                     |

SCHOLARONE™  
Manuscripts

# Extending the RIGHT statement for Reporting Adapted Practice Guidelines in Health Care: the RIGHT-Ad@pt Checklist protocol

## *Authors*

Yang Song<sup>1</sup>, Andrea J Darzi<sup>2</sup>, Mónica Ballesteros<sup>3</sup>, Laura Martínez Gracia<sup>1\*</sup>, Pablo Alonso-Coello<sup>1,4,5</sup>, Thurayya Arayssi<sup>6</sup>, Soumyadeep Bhaumik<sup>7</sup>, Yaolong Chen<sup>8,9</sup>, Francoise Cluzeau<sup>10</sup>, Davina Ghersi<sup>11</sup>, Paulina Fuentes Padilla<sup>12</sup>, Étienne V Langlois<sup>13</sup>, Holger J Schünemann<sup>5</sup>, Robin WM Vernooij<sup>14</sup>, Elie A Akl<sup>2,5,15\*</sup>

## *Author affiliations*

1. Iberoamerican Cochrane Centre - Biomedical Research Institute Sant Pau (IIB Sant Pau), Barcelona, Spain
2. AUB GRADE Center, American University of Beirut, Lebanon
3. Hospital Universitario Vall d'Hebron, Barcelona, Spain
4. CIBER de Epidemiología y Salud Pública (CIBERESP), Spain
5. Department of Health Research Methods, Evidence, and Impact, McMaster GRADE center, McMaster University, Canada
6. Weill Cornell Medicine-Qatar, Qatar
7. The George Institute for Global Health, India
8. Evidence-Based Medicine Center, School of Basic Medical Sciences, Lanzhou University, Lanzhou, China
9. WHO Collaborating Centre for Guideline Implementation and Knowledge Translation
10. School of Public Health, Faculty of Medicine, Imperial College London, UK
11. National Health and Medical Research Council, Australia
12. Facultad de Medicina y Odontología, Universidad de Antofagasta, Chile
13. Alliance for Health Policy and Systems Research, World Health Organization
14. Department of Research, Netherlands Comprehensive Cancer Organisation (IKNL), Utrecht, Netherlands
15. Department of Internal Medicine, American University of Beirut, Lebanon

## *Author Email Address*

Yang Song - [yangsong@cochrane.es](mailto:yangsong@cochrane.es);

1  
2  
3 Andrea J Darzi - [andreaidarzi@gmail.com](mailto:andreaidarzi@gmail.com);

4  
5 Mónica Ballesteros - [mopbasilva2015@gmail.com](mailto:mopbasilva2015@gmail.com);

6  
7 Laura Martínez Gracia\* - [laura.martinez.garcia@cochrane.es](mailto:laura.martinez.garcia@cochrane.es);

8  
9 Pablo Alonso-Coello - [PALonso@santpau.cat](mailto:PALonso@santpau.cat);

10  
11 Thurayya Arayssi - [tha2002@qatar-med.cornell.edu](mailto:tha2002@qatar-med.cornell.edu);

12  
13 Soumyadeep Bhaumik - [drsoumyadeepbhaumik@gmail.com](mailto:drsoumyadeepbhaumik@gmail.com);

14  
15 Yaolong Chen - [chenyaolong@lzu.edu.cn](mailto:chenyaolong@lzu.edu.cn);

16  
17 Françoise Cluzeau - [f.cluzeau@imperial.ac.uk](mailto:f.cluzeau@imperial.ac.uk);

18  
19 Davina Gherzi - [Davina.Gherzi@nhmrc.gov.au](mailto:Davina.Gherzi@nhmrc.gov.au);

20  
21 Paulina Fuentes Padilla - [paulinafuentespadilla@yahoo.com](mailto:paulinafuentespadilla@yahoo.com);

22  
23 Étienne V Langlois - [langloise@who.int](mailto:langloise@who.int);

24  
25 Holger J Schünemann - [schuneh@mcmaster.ca](mailto:schuneh@mcmaster.ca);

26  
27 Robin WM Vernooij - [robinvernooij@gmail.com](mailto:robinvernooij@gmail.com),

28  
29 Elie A Akl\* - [ea32@aub.edu.lb](mailto:ea32@aub.edu.lb).

30  
31  
32  
33  
34  
35  
36 ***\*Corresponding authors***

37  
38 **Elie A. Akl**

39  
40 ea32@aub.edu.lb

41  
42 Department of Internal Medicine, American University of Beirut, Beirut, Lebanon

43  
44  
45 **Laura Martínez García**

46  
47 laura.martinez.garcia@cochrane.es

48  
49 Iberoamerican Cochrane Centre - Biomedical Research Institute Sant Pau (IIB Sant Pau),  
50  
51 Barcelona, Spain

## ***Abstract***

### **Introduction**

Adapting guideline means the use of existing trustworthy guidelines, with (adapt) or without (adopt) modifications, to provide local, regional, or national guidance. Adaptation is an increasingly used methodology for the efficient development of contextualised recommendations. Although the Essential Reporting Items of Practice Guidelines in Healthcare (RIGHT) statement can be useful for reporting adapted guidelines, it does not address all important aspects of the adaptation process. The objective of our project is to develop an extension of the RIGHT statement tailored to adapted guidelines (RIGHT-Ad@pt Checklist).

### **Methods and analysis**

To develop the checklist, we will build on the RIGHT statement, use the best available evidence from published methodological research on guideline adaptation, and use a multistep process that includes: 1) establishment of a Working Group; 2) generation of an initial checklist; 3) optimisation of the checklist; and 4) approval of the final checklist. To optimize the checklist we will conduct an initial assessment of adapted guidelines, semi-structured interviews, a Delphi consensus survey, an external review by guidelines developers and users, and a final assessment of adapted guidelines.

### **Ethics and dissemination**

We have obtained a waiver of approval from the Clinical Research Ethics Committee at the Hospital de la Santa Creu i Sant Pau (Barcelona, Spain). The dissemination activities will include: 1) publication of the RIGHT-Ad@pt Checklist in a peer-reviewed journal, 2) presentation the project to relevant stakeholders (e.g., via international conferences, electronic bulletins, related websites (<http://www.right-statement.org/>, <http://www.equator-network.org/>), and social media (e.g., Twitter), and 3) translation of the checklist into different languages. The implementation activities will include: 1) engaging with journal editors to encourage the use of the checklist, and 2) evaluating the impact of the checklist on the reporting of adapted guidelines. Finally, we will continuously seek feedback from stakeholders, surveil new relevant evidence and, if necessary, update the checklist.

## Keywords

Evidence-based medicine, guideline adaptation, guidelines as topic, practice guideline, quality, reporting standards.

## Word count

|            |      |
|------------|------|
| Abstract   | 300  |
| Manuscript | 3315 |

For peer review only

## ***Strengths and Limitations***

- There is no current tool for reporting adapted guidelines. The RIGHT-Ad@pt checklist will full fill this gap and provide a clear guidance for the reporting of guideline adaptation.
- To develop the checklist, we will use the best available methodological research evidence, adopt a systematic and rigorous multistep process, and collect and build on the views and experiences of international stakeholders including guidelines methodologists, policy makers, journal editors, and guideline users.
- The RIGHT-Ad@pt checklist can be used within guideline adaptation to guide reporting, improve the completeness of reporting, evaluate publications, and inform implementation decisions of health care.
- We will not conduct a complete formal validation of the checklist since our current process will not include an assessment of neither construction nor criterion validity

## Introduction

The World Health Organization (WHO) defines guidelines as “systematically developed evidence-based statements which assist providers, recipients and other stakeholders to make informed decisions about appropriate health interventions”. Guidelines have been increasingly used to provide guidance for policies or public health interventions, changes in resource availability or access to services based on evidence [1]. There is evidence that the methodological quality of guidelines has slowly improved over the last decades [2-4]. However, most guidelines developers do not have enough resources for developing high quality *de novo* guidelines [5]. Most low- and middle-income countries still do not have formal organizations, technical capacity or collaborations to develop evidence-based guidelines [6]. When guidelines are developed in those settings, their quality is typically poor [7-13]. Adapting published high quality, evidence-informed guidelines becomes a more efficient option [14-16].

Adaption of guidelines means the use of existing trustworthy guidelines, with (adapt) or without (adopt) modifications, to provide local, regional, or national guidance [15-17]. Schünemann et al. defined adapted recommendations as recommendations with: 1) potential change in the specific population, intervention, or comparator than the original recommendations, 2) potential change in the certainty of the evidence, and 3) information on “conditions”, monitoring, implementation, and implications for research [15]. Adopted recommendations were defined as recommendations with: 1) the same specific population, intervention, and comparators as the original recommendations, 2) the same certainty of the evidence, and 3) information on implementation [15]. Adaptation of guidelines is an increasingly used methodology for the efficient development of contextualised recommendations that are relevant for diverse health systems [15, 17-18]. Guideline adaptation takes into consideration local contextual factors such as language, availability and accessibility of services and resources, the health care setting, and the relevant stakeholders’ cultural and ethical values [19]. At the same time, it should be based on similar systematic and transparent approaches as the source guideline in order to benefit from its quality and validity [20]. However, adaptation is not always possible. For example, when a trustworthy guideline is not available, a *de novo* guideline development process needs to be considered [15, 21].

Despite the increasing need, there is no standard adaptation method implemented internationally [21, 22]. A systematic review of the literature identified eight published frameworks for adaptation of clinical, public health or health system guidelines, concluding



1  
2  
3 that the “adaptation” phases of the processes were notable different [23]. Moreover, the  
4 process for adapting guidelines was usually poorly reported, including WHO guidelines [24].  
5 For example, Godah et al. 2016 systematically assessed the processes employed in the  
6 adaptation of World Health Organization (WHO) guidelines for human immunodeficiency virus  
7 (HIV) and tuberculosis (TB). Out of 170 eligible adapted guidelines, only 32 (32/170, 19%)  
8 reported the methods used in the adaptation process [24]. Similarly, Abdul-Khalek et al. 2017  
9 assessed the methods used for adapting health-related guidelines published in peer-reviewed  
10 journals [25]. Out of the 72 included adapted guidelines, 57 reported some degree of detail  
11 about the adaptation method used, and only 23 (23/57, 40%) reported using a specific  
12 adaptation method. These findings call for a need to optimize the methods used in guideline  
13 adaptation, and to improve the reporting of the adaptation process in adapted guidelines [24].  
14  
15  
16  
17  
18  
19  
20  
21  
22

23 Guidelines for reporting health research have been developed to enhance the accurate,  
24 complete, and transparent reporting of health research publications ([http://www.equator-](http://www.equator-network.org/)  
25 [network.org/](http://www.equator-network.org/)). Moher et al. 2010 defined a reporting guideline as “a checklist, flow diagram, or  
26 explicit text to guide authors in reporting a specific type of research, developed using explicit  
27 methodology” [26]. Its aim is to indicate the minimum reporting standards, for readers to  
28 comprehend the design, conduct, analysis and interpretation of a study, and to assess the  
29 validity of results [26-27]. A transparent reporting approach could help guideline developers  
30 frame the decision making during the development process, and guideline users about the  
31 suitability for adapting, and consequently the adaptation process.  
32  
33  
34  
35  
36  
37  
38  
39

40 Currently, the main tools available for the reporting of guidelines development are: 1) the  
41 Appraisal of Guidelines for Research and Evaluation II (AGREE II) instrument, including the  
42 AGREE Reporting Checklist [28], and 2) the Reporting Items for practice Guidelines in  
43 Healthcare (RIGHT) statement to improve the reporting of guidelines [29]. The RIGHT  
44 statement was formally developed as a reporting checklist for *de novo* guidelines [29].  
45 Although it could be useful for the reporting of adapted guidelines [30], it does not cover some  
46 of the steps that are specific to guidelines adaptation (e.g. description of methods used to  
47 search and identify guidelines) [29]. Therefore, to ensure the rigorousness, transparency,  
48 clarity, and reproducibility of reporting the adaptation process, we will develop an extension of  
49 RIGHT statement for the reporting of adapted guidelines.  
50  
51  
52  
53  
54  
55  
56  
57  
58  
59  
60

## ***Objective***

To develop the RIGHT-Ad@pt Checklist, as an extension of the RIGHT statement tailored to adapted guidelines.

## ***Methods and analysis***

To develop the checklist, we will build on the RIGHT statement [29], review methodology research evidence on guidelines adaptation [23-25], and adopt a multistep process we have successfully implemented in the development of similar tools [31-32]. Table 1 describes the multistep development process of the RIGHT-Ad@pt Checklist, which includes: 1) establishment of a Working Group; 2) generation of an initial checklist; 3) optimisation of the checklist (an initial assessment of adapted guidelines, semi-structured interviews, a Delphi consensus survey, an external review by guidelines developers and users, and a final assessment of adapted guidelines); and 4) approval of the final checklist. Figure 1 reproduces the process in a graphical format.

### **1. Establishment of the RIGHT-Ad@pt Working Group**

The RIGHT-Ad@pt Working Group will include: 1) a Coordination Team; 2) an Advisory Group; and 3) a Delphi Panel.

#### **1.1. Coordination Team**

The Coordination Team (YS, MB, LMG, PAC, EA) will lead and coordinate the RIGHT-Ad@pt development process and ensure its completion according to the set timeline. Specifically, the Coordination Team will be responsible for 1) generating the initial version of the checklist, 2) implementing each step of the process, and 3) reporting the findings of each step of the processes. We have collected the Conflicts of interests (ColIs) of all members of the Coordination Team (Appendix 1).

#### **1.2. Advisory Group**

The Advisory Group is a multidisciplinary group (8 to 10 people), including 1) guideline methodological experts (defined as having experience and expertise in guideline methods), 2) guidelines developers (defined as having participated in guideline development groups and/or guideline adaptation groups at least once in the past year), 3) guideline users (defined as healthcare professionals that use guidelines on a regular basis) and; 4) journal editors of guideline related journals [26]. Members of the Advisory Group will review and provide expert

1  
2  
3 advice during the different steps of the RIGHT-Ad@pt development process. The Advisory  
4 Group will approve the final checklist and accompanying guidance. We have collected the CoIs  
5 of all members of the Advisory Group (Appendix 1).  
6  
7  
8  
9

### 10 **1.3. Delphi Panel**

11 The Delphi Panel will be comprised of 20 to 30 members [33], with profiles similar to those of  
12 the members of the Advisory Group. We will identify participants from the Guidelines  
13 International Network (GIN) Adaptation Guidelines Working Group (<http://www.g-i->  
14 [n.net/working-groups/adaptation](http://www.g-i-n.net/working-groups/adaptation)), WHO, authors of adapted guidelines [25], and expert  
15 colleagues. We will aim for country income and gender representativeness of our participants.  
16 The panel's CoIs will be collected.  
17  
18  
19  
20  
21  
22

## 23 **2. Generation of the initial checklist**

24 The Coordination Team will generate the initial version of the checklist building on the RIGHT  
25 statement [29]. We will conduct this step via face to face and online meetings within the  
26 Coordination Team. The Coordination Team will review the results, draft a report with a  
27 proposal of the initial version for the Advisory Group to review, and produce a final version  
28 taken into consideration their feedback.  
29  
30  
31  
32  
33  
34

## 35 **3. Optimisation of the checklist**

### 36 **3.1. Initial assessment of adapted guidelines**

37 We will survey published adapted guidelines to assess the adequacy of each item of the initial  
38 checklist, and refine that checklist. We will also record the main characteristics of the adapted  
39 guidelines (e.g. title, year, or adaptation process), and completeness of reporting process for  
40 adapting guidelines using the initial checklist (Table 2).  
41  
42  
43  
44  
45  
46

47 We will assess a convenience sample of ten adapted guidelines available in English and  
48 published in the last five years. We will also take into account country income level, type of  
49 organization, and region. Two reviewers from the Coordination Team will independently apply  
50 the initial version of the checklist to adapted guidelines using an *ad hoc* form. The two  
51 reviewers will resolve potential disagreements by discussion, and if necessary, by consulting a  
52 third reviewer.  
53  
54  
55  
56  
57  
58  
59  
60

1  
2  
3 For quantitative variables (characteristics of adapted guidelines, completeness of reporting,  
4 and adequacy), we will calculate absolute frequencies and proportions. For qualitative  
5 variables (suggestions to improve the checklist), we will use content analysis to summarise and  
6 draw conclusions [34]. The Coordination Team will review the results, draft a report and  
7 review and agree on the relevant checklist modifications. If members of the Coordination  
8 Team do not reach consensus on specific items, they will consult the Advisory Group.  
9  
10  
11  
12

### 13 14 15 **3.2. Semi-structure interviews**

16 We will interview guideline developers (involved in guideline adaptation in the last three years)  
17 to explore current practices in adaptation of guidelines. We will also explore the participants'  
18 understanding of each item and refine the initial version of the checklist. Each interview will  
19 last approximately one hour and will be recorded and transcribed with interviewee's  
20 permission. We will also record the characteristics of participants and their workplaces, and  
21 participants' overall assessment of the checklist (Table 2).  
22  
23  
24  
25  
26  
27

28 We will identify participants for the semi-structure interview with the support of the Advisory  
29 Group. We will continue recruitment and collect data until information becomes repetitive and  
30 no new information emerges (sampling saturation) [35-36].  
31  
32  
33

34  
35 For quantitative variables (characteristics of participants and workplaces, participants'  
36 understanding of each item, and participants' overall assessment of the checklist), we will  
37 calculate absolute frequencies and proportions. For qualitative variables (participants' views  
38 and experiences, and suggestions to improve the checklist), we will use content analysis to  
39 summarise and draw conclusions [34]. The Coordination Team will review the results, draft a  
40 report and review and agree on the relevant checklist modifications. If members of the  
41 Coordination Team do not reach consensus on specific items, they will consult the Advisory  
42 Group.  
43  
44  
45  
46  
47  
48  
49

### 50 **3.3. Delphi consensus survey**

51 We will conduct a Delphi consensus survey to reach a consensus with the Delphi Panel about  
52 the current version of the checklist. We will also record response rate, characteristics of  
53 participants and workplaces, participants' understanding of each item, and participants'  
54 overall assessment of the checklist (Table 2).  
55  
56  
57  
58  
59  
60

1  
2  
3 Before the first Delphi round, we will provide the Delphi Panel Members with a brief  
4 background material on the topic. In the first Delphi round, we will ask participants to rate  
5 whether each item should be included in the checklist and its understanding using a seven-  
6 point Likert scale (1=strongly disagree and 7=strongly agree) [37]. We will calculate the median  
7 score for inclusion of each item and will classify them as 1) excluded (median score of 0–3  
8 points), 2) review, modify and retest (median score of 4–5 points or with substantial  
9 comments), and 3) included (median score of 6 to 7 points and without substantial comments)  
10 [31]. After each Delphi round, we will provide feedback to Delphi Panel Members (all  
11 responses will be anonymised prior to circulation). We will conduct additional Delphi rounds  
12 until consensus regarding the checklist is reached and no more relevant comments on the  
13 items are provided (two or three rounds, as needed). We will use online software to design the  
14 survey and collect responses (<http://www.clinapsis.com/>).

15  
16  
17 For quantitative variables (response rate, characteristics of participants and workplaces,  
18 inclusion score, participants' understanding of each item, and participants' overall assessment  
19 of the checklist), we will calculate absolute frequencies and proportions. For qualitative data  
20 (suggestions to improve the checklist), we will use content analysis to summarise and draw  
21 conclusions [34]. We will not consider questionnaires with no response for more than 20% of  
22 the items. The Coordination Team will review the results of the Delphi consensus survey, draft  
23 a report with a proposal for the Advisory Group to review, and produce a final version taken  
24 into consideration their feedback.

### 25 26 27 **3.4. External review**

#### 28 29 30 **3.4.1. External review by guidelines developers**

31 We will survey guideline developers who were involved in guideline adaptation over the past  
32 three years on the usefulness of each item [38], and refine the initial version of the checklist.  
33 We will also record response rate, the characteristics of participants and workplaces,  
34 participants' understanding of each item, and participants' overall assessment of the checklist  
35 (Table 2).

36  
37  
38 We will identify participants by contacting professionals associated with the GIN community  
39 (<http://www.g-i-n.net>) and WHO. We will use an online software to design the survey and  
40 collect responses (<http://www.clinapsis.com/>).

1  
2  
3 For quantitative variables (response rate, characteristics of participants and workplaces,  
4 usefulness score, participants' understanding of each item, and participants' overall  
5 assessment of the checklist), we will calculate absolute frequencies and proportions. For  
6 qualitative data (suggestions to improve the checklist), we will use content analysis to  
7 summarise and draw conclusions [34]. We will not consider questionnaires with no response  
8 for more than 20% of the items.  
9

#### 14 **3.4.2. External review by guidelines users**

16 We will conduct external review semi-structured interviews with guidelines users who have  
17 used adapted guidelines over the past three years, to explore the usefulness of each item and  
18 refine the initial version of the checklist. Each interview will last approximately one hour and  
19 will be recorded and transcribed with interviewee's permission. We will also record the  
20 characteristics of participants and workplaces, participants' understanding of each item, and  
21 participants' overall assessment of the checklist (Table 2).  
22  
23  
24  
25  
26

27 We will identify the participants with the support of the Advisory Group and will continue  
28 recruitment and collect data until information becomes repetitive and no new information  
29 emerges (sampling saturation) [35-36].  
30  
31  
32

34 For quantitative variables (characteristics of participants and workplaces, usefulness score,  
35 participants' understanding of each item, and participants' overall assessment of the checklist),  
36 we will calculate absolute frequencies and proportions. For qualitative data (participants'  
37 views and experiences, and suggestions to improve the checklist), we will use content analysis  
38 to summarise and draw conclusions [34]. The Coordination Team will review the results of the  
39 external review (guideline developers and users), draft a report with a proposal for the  
40 Advisory Group to review, and produce a final version taken into consideration their feedback.  
41  
42  
43  
44  
45  
46  
47

#### 48 **3.5. Final assessment of adapted guidelines**

49 We will conduct a final assessment of the validity of each item in a set of adapted guidelines.  
50 We will also record the main characteristics of the adapted guidelines (e.g. title, year, or  
51 adaptation process), and completeness of the reporting process for adapting guidelines using  
52 the initial checklist (Table 2).  
53  
54  
55  
56  
57

58 We will assess a convenience sample of ten guidelines available in English and published in the  
59 last five years. We will also take into account country income level, type of organization, and  
60

1  
2  
3 region. Two reviewers from the Coordination Team will independently apply the optimized  
4 version of the checklist using an *ad hoc* form. The two reviewers will resolve potential  
5 disagreements by discussion, and if necessary by consulting a third reviewer.  
6  
7  
8  
9

10 For quantitative variables (characteristics of adapted guidelines, completeness of reporting,  
11 and adequacy), we will calculate absolute frequencies and proportions. For qualitative  
12 variables (suggestions from reviewers), we will use content analysis to summarise and draw  
13 conclusions [34]. The Coordination Team will review the results, draft a report and review and  
14 agree on the relevant checklist modifications. If members of the Coordination Team do not  
15 reach consensus on specific items, they will consult the Advisory Group.  
16  
17  
18  
19

#### 20 21 **4. Approval of the final checklist**

22 The Coordination Team will generate the final version of the checklist. The final checklist will  
23 highlight the changes from the RIGHT statement [29], including 1) the items that remained  
24 unchanged, 2) the items that were modified, 3) the items that were added as part of the  
25 extension, and 4) the items that were omitted. All members of the Coordination Team and the  
26 Advisory Group will need to review and approve the final version of the checklist through  
27 consensus discussion.  
28  
29  
30  
31  
32  
33

### 34 35 ***Discussion***

#### 36 37 **Executive summary**

38 The aim of this project is to develop the RIGHT-Ad@pt Checklist, as an extension of the RIGHT  
39 statement tailored for guideline adaptation, to improve the rigor and transparency of guideline  
40 adaptation reporting. To develop the checklist, we will build on the RIGHT statement, use the  
41 best available evidence from published methodological research on this topic, and use a  
42 rigorous multistep process involving multiple stakeholders.  
43  
44  
45  
46  
47  
48

#### 49 50 **Our study in the context of previous research**

51 Adaptation of high quality guidelines is an alternative to developing *de novo* guidelines that  
52 saves both time and resources, and avoids duplication of effort. The ADAPTE framework is one  
53 of the earliest systematic approaches to adapt guidelines to local context [14, 39]. Building in  
54 work done for WHO in 2006, the "GRADE-ADOLOPMENT" framework proposed using the  
55 GRADE Evidence to Decision (EtD) frameworks for the adaptation, adoption, and *de novo*  
56 development of guidelines [15]. Despite these advances, there is variability in the quality of  
57  
58  
59  
60

1  
2  
3 reporting of adapted practice guidelines and no guidance for their reporting is available [23,  
4 25]. The proposed checklist might help with reducing the variability of adaptation process and  
5 improving the quality of reporting. The checklist is not intended to support guideline  
6 development, which will be done through an extension of the GIN-McMaster Guideline  
7 Development Checklist [40].  
8  
9  
10

## 11 12 13 **Strengths and Limitations** 14

15 Our proposal has some limitations. For example, we will include only guidelines published in  
16 English in the assessment of adapted guidelines. The checklist will inform about the  
17 completeness of the reporting but not necessarily about the quality of the adaptation process.  
18 We will not conduct a complete formal validation of the checklist since our current process will  
19 not include an assessment of neither construction nor criterion validity [41]; however, our  
20 proposed approach will ensure both face and content validity.  
21  
22  
23  
24  
25

26 Our proposal has several strengths. The development of the checklist will be comprehensive,  
27 including the use of previous methodological evidence [23-25, 29, 31-32], and engagement of  
28 the multidisciplinary international guideline community. We will collect views and experiences  
29 from different stakeholders, including methodologists, guideline developers, guidelines users  
30 and journal editors. We will also ensure the diversity of participants in terms of country level of  
31 income, gender, and field of expertise. This will allow us to incorporate the different  
32 stakeholders' perspective about the adaptation of guidelines. We will address the risk of bias  
33 in each step of the development process. To minimise interviewer bias, semistructured  
34 interviews will be conducted using an interview guide. To minimise selection bias, we will  
35 invite all GIN Adaptation Guidelines Working Group members as well as other stakeholders to  
36 join the Delphi Panel and to participate in the external review survey. To minimise non-  
37 response bias, we will make the survey available online for four weeks and we will send two  
38 reminders prior to the round closing date.  
39  
40  
41  
42  
43  
44  
45  
46  
47  
48  
49

## 50 **Implications for practice and research** 51

52 RIGHT-Ad@pt will help improve the completeness when reporting adapted guidelines,  
53 therefore contribute to improve their quality, and facilitate their implementation. The  
54 checklist will allow the guideline developers to guide their reporting, journals editors to  
55 improve the reporting of published adapted guidelines, policy makers to inform on  
56 implementation decisions, and guideline users to evaluate the completeness of the reporting  
57  
58  
59  
60



1  
2  
3 within adapted guidelines. Future research should focus on the performance of a complete  
4 formal validation of the checklist and its assessment in a representative sample of  
5 contemporary adapted guidelines. Surveillance on the use of the checklist and assessment of  
6 its impact could also be a topic of research.  
7  
8  
9

## 10 11 **Ethics and Dissemination** 12

13 The dissemination activities will include: 1) publication of the RIGHT-Ad@pt Checklist in a peer-  
14 reviewed journal, 2) presentation the project to relevant stakeholders (e.g., via international  
15 conferences, electronic bulletins, related websites (<http://www.right-statement.org/>,  
16 <http://www.equator-network.org/>), and social media (e.g., Twitter), and 3) translation of the  
17 checklist into different languages. The implementation activities will include: 1) engaging with  
18 journal editors to encourage the use of the checklist, and 2) evaluation of the impact of the  
19 checklist on the reporting of adapted guidelines. Finally, we will continuously seek feedback  
20 from stakeholders, surveil new relevant evidence and, if necessary, update the checklist.  
21  
22  
23  
24  
25  
26  
27  
28  
29  
30  
31  
32  
33  
34  
35  
36  
37  
38  
39  
40  
41  
42  
43  
44  
45  
46  
47  
48  
49  
50  
51  
52  
53  
54  
55  
56  
57  
58  
59  
60

### ***List of abbreviations***

AGREE II: Appraisal of Guidelines for Research and Evaluation II; CoIs: Conflicts of interests;

GRADE: The Grading of Recommendations Assessment, Development and Evaluation;

EtD: GRADE Evidence to Decision; GIN: Guidelines International Network;

HIV: Human immunodeficiency virus;

RIGHT: Reporting Items of Practice Guidelines in Healthcare;

RIGHT-Ad@pt: Extension of the RIGHT statement for Adapted Practice Guidelines.

TB: Tuberculosis;

WHO: World Health Organization.

For peer review only

## ***Declarations***

### **Author contributions**

Y.S., A.D., L.M.G, P.A-C., and E.A.A. wrote the first draft of the manuscript, together with M. B., they form the coordination team and have day to day responsibility for the project. T.A., S.B., Y.L.C., F.C., D.G., P.F.P., E.V.L., H.J.S., and R.W.M.V. are independent advisors of the project and provide methodological contributions for the manuscript. All authors critically reviewed the manuscript and approved its final version.

### **Funding**

Y.S. is funded by China scholarship Council (No. 201707040103). L.M.G. is funded by a Miguel Servet contract from the Instituto de Salud Carlos III (CP18/00007). The funders had no role in the study design, data collection and analysis, interpretation of data, and writing the manuscript

### **Competing Interests**

E.A.A. and H.J.S. have intellectual CoIs related to his contribution to the development of methods of guideline adaptation, the RIGHT statement, and methodological studies in the field. S.B. is Analyses Advisor for BMJ and Associate Editor at BMJ Global Health and BMC Systematic Reviews. Other members have clarified they do not have relevant conflicts.

### **Ethics approval**

Clinical Research Ethics Committee at the Hospital de la Santa Creu i Sant Pau (Barcelona, Spain)

### **Availability of data and material**

The information of all participants is available in the Appendix 1

## References

1. World Health Organization. WHO handbook for guideline development: WHO handbook for guideline development, 2014.
2. Alonso-Coello P, Irfan A, Sola I, Gich I, Delgado-Noguera M, Rigau D, et al. The quality of clinical practice guidelines over the last two decades: a systematic review of guideline appraisal studies. *Qual Saf Health Care*. 2010;19:e58.
3. Armstrong JJ, Goldfarb AM, Instrum RS, MacDermid JC. Improvement evident but still necessary in clinical practice guideline quality: a systematic review. *J Clin Epidemiol*. 2017;81:13-21.
4. Institute of Medicine: Clinical Practice Guideline We Can Trust. Washington, DC: The National Academies Press 2011.
5. Schünemann HJ, Fretheim A, Oxman AD. WHO Advisory Committee on Health Research. Improving the use of research evidence in guideline development: 1. Guidelines for guidelines. *Health Res Policy Syst*. 2006;4:13.
6. Bhaumik S. Use of evidence for clinical practice guideline development. *Trop Parasitol*. 2017;7(2):65-71.
7. Bhaumik S, Jagadesh S, Ellatar M, Kohli N, Riedha M, Moi M. Clinical practice guidelines in India: Quality appraisal and the use of evidence in their development. *J Evid Based Med*. 2018;11(1): 26-39.
8. Canelo-Aybar C, Balbin G, Perez-Gomez Á, Florez ID. [Clinical practice guidelines in Peru: evaluation of its quality using the AGREE II instrument]. *Rev Peru Med Exp Salud Publica*. 2016;33(4):732-738.
9. Kredo T, Gerritsen A, van Heerden J, Conway S, Siegfried N. Clinical practice guidelines within the Southern African Development Community: a descriptive study of the quality of guideline development and concordance with best evidence for five priority diseases. *Health Res Policy Syst*. 2012 5(10):1.
10. Machingaidze S, Zani B, Abrams A, Durao S, Louw Q, Kredo T, et al. Series: Clinical Epidemiology in South Africa. Paper 2: Quality and reporting standards of South African primary care clinical practice guidelines. *J Clin Epidemiol*. 2017;83:31-36.
11. Machingaidze S, Grimmer K, Louw Q, Kredo T, Young T, Volmink J. Next generation clinical guidance for primary care in South Africa – credible, consistent and pragmatic. *PLoS ONE*. 2018;13(3): e0195025.

12. Molino CG, Romano-Lieber NS, Ribeiro E, de Melo DO. Non-Communicable Disease Clinical Practice Guidelines in Brazil: A Systematic Assessment of Methodological Quality and Transparency. *PLoS One*. 2016;11(11):e0166367.
13. Talagala IA, Samarakoon Y, Senanayake S, Abeysena C. Sri Lankan clinical practice guidelines: A methodological quality assessment utilizing the AGREE II instrument. *J Eval Clin Pract*. 2018.
14. Fervers B, Burgers JS, Haugh MC, Latreille J, Mlika-Cabanne N, Paquet L, et al. Adaptation of clinical guidelines: literature review and proposition for a framework and procedure. *Int J Qual Health Care*. 2006;18(3): 167–176.
15. Schünemann HJ, Wiercioch W, Brozek J, Etzeandia-Ikobaltzeta I, Mustafa RA, Manja V, et al. GRADE Evidence to Decision (EtD) frameworks for adoption, adaptation, and de novo development of trustworthy recommendations: GRADE-ADOLOPMENT. *J Clin Epidemiol*. 2017;81:101-110.
16. Fervers B, Burgers JS, Voellinger R, Brouwers M, Browman GP, Graham ID, et al. Guideline adaptation: an approach to enhance efficiency in guideline development and improve utilisation. *BMJ Qual Saf*. 2011;20(3):228-36.
17. Darzi A, Harfouche M, Arayssi T, Alemadi S, Alnaqbi KA, Badsha H, et al. Adaptation of the 2015 American College of Rheumatology treatment guideline for rheumatoid arthritis for the Eastern Mediterranean Region: an exemplar of the GRADE Adolopment. *Health Qual Life Outcomes*. 2017;15: 183.
18. Okely AD, Ghersi D, Hesketh KD, Santos R, Loughran SP, Cliff DP, et al. A collaborative approach to adopting/adapting guidelines - The Australian 24-Hour Movement Guidelines for the early years (Birth to 5 years): an integration of physical activity, sedentary behavior, and sleep. *BMC Public Health*. 2017; 17(Suppl 5): 869.
19. Burgers JS, Anzueto A, Black PN, Cruz AA, Fervers B, Graham ID, et al. Adaptation, evaluation, and updating of guidelines: article 14 in Integrating and coordinating efforts in COPD guideline development. An official ATS/ERS workshop report. *Proc Am Thorac Soc*. 2012;9(5):304-10.
20. Kristiansen A, Brandt L, Agoritsas T, Akl EA, Berge E, Flem Jacobsen A, et al. Applying new strategies for the national adaptation, updating, and dissemination of trustworthy guidelines: results from the Norwegian adaptation of the Antithrombotic Therapy and the Prevention of Thrombosis, 9th Ed: American College of Chest Physicians Evidence-Based Clinical Practice Guidelines. *Chest*. 2014;146(3):735-61.
21. Mehndiratta A, Sharma S, Prakash N, Sankar J, Cluzeau F. Adapting clinical guidelines in India—a pragmatic approach. *BMJ*. 2017;359:j5147.

- 1
  - 2
  - 3
  - 4
  - 5
  - 6
  - 7
  - 8
  - 9
  - 10
  - 11
  - 12
  - 13
  - 14
  - 15
  - 16
  - 17
  - 18
  - 19
  - 20
  - 21
  - 22
  - 23
  - 24
  - 25
  - 26
  - 27
  - 28
  - 29
  - 30
  - 31
  - 32
  - 33
  - 34
  - 35
  - 36
  - 37
  - 38
  - 39
  - 40
  - 41
  - 42
  - 43
  - 44
  - 45
  - 46
  - 47
  - 48
  - 49
  - 50
  - 51
  - 52
  - 53
  - 54
  - 55
  - 56
  - 57
  - 58
  - 59
  - 60
22. Kredo T, Bernhardsson S, Machingaidze S, Young T, Louw Q, Ochodo E, et al. Guide to clinical practice guidelines: the current state of play. *Int J Qual Health Care*. 2016;28(1):122-8.
23. Darzi A, Abou-Jaoude EA, Agarwal A, Lakis C, Wiercioch W, Santesso N, et al. A methodological survey identified eight proposed frameworks for the adaptation of health related guidelines. *J Clin Epidemiol*. 2017; 86:3-10.
24. Godah MW, Abdul Khalek RA, Kilzar L, Zeid H, Nahlawi A, Lopes LC, et al. A very low number of national adaptations of the World Health Organization guidelines for HIV and tuberculosis reported their processes. *J Clin Epidemiol*. 2016; 80:50-56.
25. Abdul-Khalek RA, Darzi AJ, Godah MW, Kilzar L, Lakis C, Agarwal A, et al. Methods used in adaptation of health-related guidelines: A systematic survey. *J Glob Health*. 2017;7(2):020412.
26. Moher D, Schulz KF, Simera I, Altman DG. Guidance for Developers of Health Research Reporting Guidelines. *Plos Med*. 2010; 7(2):e1000217
27. Liberati A, Altman DG, Tetzlaff J, Mulrow C, Gotzsche PC, Ioannidis JPA, et al. The PRISMA statement for reporting systematic reviews and meta-analyses of studies that evaluate healthcare interventions: explanation and elaboration. *Plos Med*. 2009;6(7):e1000100.
28. Brouwers MC, Kerkvliet K, Spithoff K; AGREE Next Steps Consortium. The AGREE Reporting Checklist: a tool to improve reporting of clinical practice guidelines. *BMJ*. 2016;352:1152.
29. Chen Y, Yang K, Marusic A, Qaseem A, Meerpohl JJ, Flottorp S, et al. A Reporting Tool for Practice Guidelines in Health Care: The RIGHT Statement. *Ann Intern Med*. 2017;166(2):128-32.
30. Tokalić R, Vidak M, Buljan I, Marusic A. Reporting quality of European and Croatian health practice guidelines according to the RIGHT reporting checklist. *Implement Sci*. 2018;13(1):135.
31. Vernooij RW, Alonso-Coello P, Brouwers M, Martínez García L; CheckUp Panel. Reporting Items for Updated Clinical Guidelines: Checklist for the Reporting of Updated Guidelines (CheckUp). *PLoS Med*. 2017;14(1):1002207.
32. Martínez García L, Pardo-Hernandez H, Niño de Guzman E, Superchi C, Ballesteros M, McFarlane E, et al. Development of a prioritisation tool for the updating of clinical guideline questions: the UpPriority Tool protocol. *BMJ Open*. 2017;7(8):e017226.
33. Akins RB, Tolson H, Cole BR. Stability of response characteristics of a Delphi panel: application of bootstrap data expansion. *BMC Med Res Methodol*. 2005;5:37.

- 1
- 2
- 3 34. Thomas J, Harden A. Methods for the thematic synthesis of qualitative research in
- 4 systematic reviews. *BMC Med Res Methodol*. 2008;8:45.
- 5
- 6 35. Grosseohme DH. Overview of qualitative research. *J Health Care Chaplain*. 2014;20:109-
- 7 22.
- 8
- 9 36. Guetterman TC. Descriptions of sampling practices within five approaches to qualitative
- 10 research in education and the health sciences. *Forum Qual Soc Res*. 2015;16:25.
- 11
- 12 37. Likert R. A technique for the measurement of attitudes. *Archives of psychology*. 1932.
- 13
- 14 38. van der Weegen S, Verwey R, Tange HJ, et al. Usability testing of a monitoring and
- 15 feedback tool to stimulate physical activity. *Patient Prefer Adherence*. 2014;8:311–22.
- 16
- 17 39. Schünemann HJ, Fretheim A, Oxman AD. Improving the use of research evidence in
- 18 guideline development: 13. Applicability, transferability and adaptation. *Health Res*
- 19 *Policy Syst*. 2006;4:25.
- 20
- 21 40. Schünemann HJ, Wiercioch W, Etzeandía I, Falavigna M, Santesso N, Mustafa R, et al.
- 22 Guidelines 2.0: systematic development of a comprehensive checklist for a successful
- 23 guideline enterprise. *CMAJ*. 2014;186(3):E123-42.
- 24
- 25 41. AGREE Collaboration. Development and validation of an international appraisal
- 26 instrument for assessing the quality of clinical practice guidelines: the AGREE project.
- 27 *Qual Saf Health Care*. 2003;12(1):18-23.
- 28
- 29
- 30
- 31
- 32
- 33
- 34
- 35
- 36
- 37
- 38
- 39
- 40
- 41
- 42
- 43
- 44
- 45
- 46
- 47
- 48
- 49
- 50
- 51
- 52
- 53
- 54
- 55
- 56
- 57
- 58
- 59
- 60

## Tables

**Table 1. Description of the multistep development process**

|                       | Establishment of the RIGHT-Ad@pt Working Group                         | Generation of the initial checklist             | Optimisation of the checklist                        |                                                                          |                                                                                                           |                                                        |                                                        |                                                      | Approval of the final checklist               |
|-----------------------|------------------------------------------------------------------------|-------------------------------------------------|------------------------------------------------------|--------------------------------------------------------------------------|-----------------------------------------------------------------------------------------------------------|--------------------------------------------------------|--------------------------------------------------------|------------------------------------------------------|-----------------------------------------------|
|                       |                                                                        |                                                 | Initial assessment of adapted guidelines             | Semi-structured interviews                                               | Delphi consensus survey                                                                                   | External review                                        |                                                        | Final assessment of adapted guidelines               |                                               |
|                       |                                                                        |                                                 |                                                      |                                                                          |                                                                                                           | Guidelines developers                                  | Guidelines users                                       |                                                      |                                               |
| <b>Main objective</b> | To identify individuals who are relevant to participate in the project | To develop the initial version of the checklist | To assess the adequacy of each item of the checklist | To explore current practices in adaptation of guidelines                 | To define the list of items to be included in the checklist                                               | To assess the usefulness of each item of the checklist | To assess the usefulness of each item of the checklist | To assess the adequacy of each item of the checklist | To approve the final version of the checklist |
| <b>Study design</b>   | -                                                                      | -                                               | Methodological survey of adapted guidelines          | Semi-structured interviews                                               | Delphi consensus survey                                                                                   | Survey                                                 | Semi-structured interviews                             | Methodological survey of adapted guidelines          | -                                             |
| <b>Participants</b>   | - Coordination Team<br>- Advisory Group<br>- Delphi Panel Members      | - Coordination Team<br>- Advisory Group         | Coordination Team (two reviewers)                    | Guidelines developers                                                    | Delphi Panel Members                                                                                      | Guidelines developers                                  | Guidelines users                                       | Coordination Team (two reviewers)                    | - Coordination Team<br>- Advisory Group       |
| <b>Main outcome</b>   | -                                                                      | -                                               | Applicability rating of each item of the checklist   | Participants' views and experiences with process for adapting guidelines | Items considered relevant to report the adaptation of guidelines                                          | Usefulness rating of each item of the checklist        | Participants' views and experiences with the checklist | Applicability rating of each item of the checklist   | -                                             |
| <b>Study size</b>     | Convenience sample                                                     | -                                               | Convenience sample of 10 adapted guidelines          | Sampling saturation                                                      | 20-30 participants from G-I-N Adaptation Guidelines Working Group, WHO, and authors of adapted guidelines | G-I-N community                                        | Sampling saturation                                    | Convenience sample of 10 adapted guidelines          | -                                             |

Abbreviations: G-I-N, Guidelines International Network; WHO, World Health Organization.



1  
2  
3  
4  
5  
6  
7  
8  
9  
10  
11  
12  
13  
14  
15  
16  
17  
18  
19  
20  
21  
22  
23  
24  
25  
26  
27  
28  
29  
30  
31  
32  
33  
34  
35  
36  
37  
38  
39  
40  
41  
42  
43  
44  
45  
46

**Table 2. Research design steps relevant to the optimisation of the checklist and corresponding variables**

|                                                | Initial assessment of adapted guidelines | Semi-structured interviews           | Delphi consensus survey                           | External review                                    |                                                   | Final assessment of adapted guidelines |
|------------------------------------------------|------------------------------------------|--------------------------------------|---------------------------------------------------|----------------------------------------------------|---------------------------------------------------|----------------------------------------|
|                                                |                                          |                                      |                                                   | Guidelines developers                              | Guidelines users                                  |                                        |
| Response rate                                  |                                          |                                      | X                                                 | X                                                  |                                                   |                                        |
| Characteristics of participants and workplaces |                                          | X                                    | X                                                 | X                                                  | X                                                 |                                        |
| Characteristics of adapted guidelines          | X                                        |                                      |                                                   |                                                    |                                                   | X                                      |
| Completeness of reporting                      | X                                        |                                      |                                                   |                                                    |                                                   | X                                      |
| Participants' views and experiences            |                                          | XX                                   |                                                   |                                                    | XX                                                |                                        |
| Assessment of each item                        | XX<br>(adequacy and suggestions)         | X<br>(understanding and suggestions) | XX<br>(inclusion, understanding, and suggestions) | XX<br>(usefulness, understanding, and suggestions) | X<br>(usefulness, understanding, and suggestions) | XX<br>(adequacy and suggestions)       |
| Overall assessment of the checklist            |                                          | X                                    | X                                                 | X                                                  | X                                                 |                                        |

Notes: XX: Main outcome; X: Other outcomes.

## Figures

Figure 1: Multistep development process of RIGHT-Ad@pt

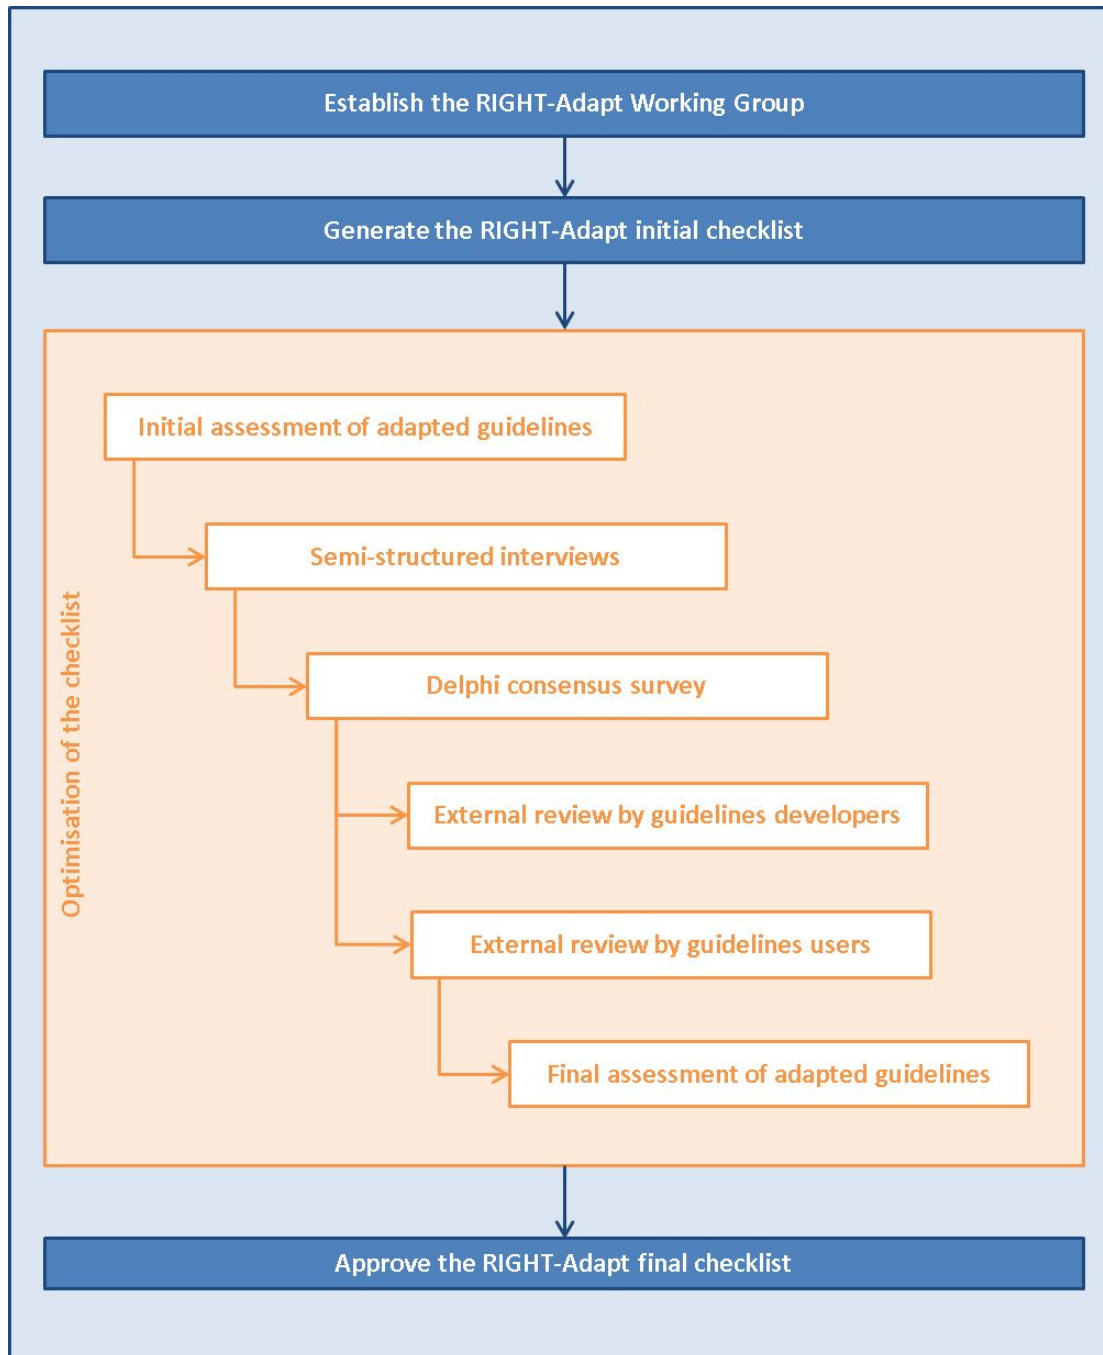

1  
2  
3  
4  
5  
6  
7  
8  
9  
10  
11  
12  
13  
14  
15  
16  
17  
18  
19  
20  
21  
22  
23  
24  
25  
26  
27  
28  
29  
30  
31  
32  
33  
34  
35  
36  
37  
38  
39  
40  
41  
42  
43  
44  
45  
46

**Appendix**

**Appendix1. Participants' information**

| Participants             | Member Role                                           | Organization                           | Country        | Income Level*       | Region*                    | Conflicts of Interests                                                                                                                                             |
|--------------------------|-------------------------------------------------------|----------------------------------------|----------------|---------------------|----------------------------|--------------------------------------------------------------------------------------------------------------------------------------------------------------------|
| <b>Coordination Team</b> |                                                       |                                        |                |                     |                            |                                                                                                                                                                    |
| <b>Participant 1</b>     | Guideline methodological expert, guidelines developer | American University of Beirut          | Lebanon        | Upper middle income | Middle East & North Africa | Intellectual Cols related to the contribution to the development of methods of guideline adaptation, the RIGHT statement, and methodological studies in the field. |
| <b>Participant 2</b>     | Guideline methodological expert, guidelines developer | Iberoamerican Cochrane Centre          | Spain          | High income         | Europe & Central Asia      | None                                                                                                                                                               |
| <b>Participant 3</b>     | Guideline methodological expert, guidelines developer | Hospital Universitari Vall d'Hebron    | Spain          | High income         | Europe & Central Asia      | None                                                                                                                                                               |
| <b>Participant 4</b>     | Guideline methodological expert                       | Iberoamerican Cochrane Centre          | Spain          | High income         | Europe & Central Asia      | None                                                                                                                                                               |
| <b>Participant 5</b>     | Guideline methodological expert                       | Iberoamerican Cochrane Centre          | Spain          | High income         | Europe & Central Asia      | None                                                                                                                                                               |
| <b>Advisory Group</b>    |                                                       |                                        |                |                     |                            |                                                                                                                                                                    |
| <b>Participant 1</b>     | Guideline User                                        | Weill Cornell Medicine-Qatar           | Qatar          | High income         | Middle East & North Africa | None                                                                                                                                                               |
| <b>Participant 2</b>     | Journal Editor                                        | The George Institute for Global Health | India          | Lower middle income | South Asia                 | Analyses Advisor for BMJ and Associate Editor at BMJ Global Health and BMC Systematic Reviews.                                                                     |
| <b>Participant 3</b>     | Methodologist                                         | Lanzhou University                     | China          | Upper middle income | East Asia & Pacific        | None                                                                                                                                                               |
| <b>Participant 4</b>     | Guideline developer                                   | Imperial College London                | United Kingdom | High income         | Europe & Central Asia      | None                                                                                                                                                               |

|                       |                                                       |                                                                |             |             |                           |                                                                                                                                                                    |
|-----------------------|-------------------------------------------------------|----------------------------------------------------------------|-------------|-------------|---------------------------|--------------------------------------------------------------------------------------------------------------------------------------------------------------------|
| <b>Participant 5</b>  | Guideline developer                                   | National Health and Medical Research Council, Australia        | Australia   | High income | East Asia & Pacific       | None                                                                                                                                                               |
| <b>Participant 6</b>  | Guideline methodological expert, guideline user       | Facultad de Medicina y Odontología, Universidad de Antofagasta | Chile       | High income | Latin America & Caribbean | None                                                                                                                                                               |
| <b>Participant 7</b>  | Policy maker                                          | World Health Organisation                                      | Switzerland | High income | Europe & Central Asia     | None                                                                                                                                                               |
| <b>Participant 8</b>  | Policy maker                                          | World Health Organisation                                      | Switzerland | High income | Europe & Central Asia     | Oversee the quality of WHO guidelines as an employee of the World Health Organization. Member of the GRADE Working Group. Co-author of the RIGHT paper.            |
| <b>Participant 9</b>  | Guideline methodological expert, guidelines developer | McMaster University                                            | Canada      | High income | North America             | Intellectual CoIs related to the contribution to the development of methods of guideline adaptation, the RIGHT statement, and methodological studies in the field. |
| <b>Participant 10</b> | Guideline methodological expert                       | Netherlands Comprehensive Cancer Organisation                  | Netherlands | High income | Europe & Central Asia     | None                                                                                                                                                               |

\*Ref from World Bank: <https://datahelpdesk.worldbank.org/knowledgebase/articles/906519-world-bank-country-and-lending-groups>

Abbreviation: CoIs: Conflicts of Interests.

# BMJ Open

## Extending the RIGHT statement for Reporting Adapted Practice Guidelines in Health Care: the RIGHT-Ad@pt Checklist protocol

|                                 |                                                                                                                                                                                                                                                                                                                                                                                                                                                                                                                                                                                                                                                                                                                                                                                                                                                                                                                                                                                                                                                                                                                                                                                                                                                                                                                                                                                                                                                                                                                                                                                                                      |
|---------------------------------|----------------------------------------------------------------------------------------------------------------------------------------------------------------------------------------------------------------------------------------------------------------------------------------------------------------------------------------------------------------------------------------------------------------------------------------------------------------------------------------------------------------------------------------------------------------------------------------------------------------------------------------------------------------------------------------------------------------------------------------------------------------------------------------------------------------------------------------------------------------------------------------------------------------------------------------------------------------------------------------------------------------------------------------------------------------------------------------------------------------------------------------------------------------------------------------------------------------------------------------------------------------------------------------------------------------------------------------------------------------------------------------------------------------------------------------------------------------------------------------------------------------------------------------------------------------------------------------------------------------------|
| Journal:                        | <i>BMJ Open</i>                                                                                                                                                                                                                                                                                                                                                                                                                                                                                                                                                                                                                                                                                                                                                                                                                                                                                                                                                                                                                                                                                                                                                                                                                                                                                                                                                                                                                                                                                                                                                                                                      |
| Manuscript ID                   | bmjopen-2019-031767.R1                                                                                                                                                                                                                                                                                                                                                                                                                                                                                                                                                                                                                                                                                                                                                                                                                                                                                                                                                                                                                                                                                                                                                                                                                                                                                                                                                                                                                                                                                                                                                                                               |
| Article Type:                   | Protocol                                                                                                                                                                                                                                                                                                                                                                                                                                                                                                                                                                                                                                                                                                                                                                                                                                                                                                                                                                                                                                                                                                                                                                                                                                                                                                                                                                                                                                                                                                                                                                                                             |
| Date Submitted by the Author:   | 30-Jul-2019                                                                                                                                                                                                                                                                                                                                                                                                                                                                                                                                                                                                                                                                                                                                                                                                                                                                                                                                                                                                                                                                                                                                                                                                                                                                                                                                                                                                                                                                                                                                                                                                          |
| Complete List of Authors:       | <p>SONG, YANG; Iberoamerican Cochrane Centre - Biomedical Research Institute Sant Pau (IIB Sant Pau)<br/>         Darzi, Andrea; American University of Beirut, AUB GRADE Center<br/>         Ballesteros, Monica; Hospital Universitario Vall d'Hebron<br/>         Martínez García, Laura; Iberoamerican Cochrane Centre - Biomedical Research Institute Sant Pau (IIB Sant Pau)<br/>         Alonso-Coello, Pablo; Iberoamerican Cochrane Centre - Biomedical Research Institute Sant Pau (IIB Sant Pau); CIBER de Epidemiología y Salud Pública (CIBERESP)<br/>         Arayssi, Thurayya; Weill Cornell Medicine-Qatar<br/>         Bhaumik, Soumyadeep; The George Institute for Global Health<br/>         Chen, Yaolong ; Lanzhou University; WHO Collaborating Centre for Guideline Implementation and Knowledge Translation<br/>         Cluzeau, Françoise; Imperial College London, School of Public Health, Faculty of Medicine<br/>         Gherji, Davina; National Health and Medical Research Council<br/>         Fuentes, Paulina; Universidad de Antofagasta, Facultad de Medicina y Odontología<br/>         Langlois, Etienne V.; World Health Organization, Alliance for Health Policy and Systems Research<br/>         Schünemann, Holger; McMaster University, Departments of Health Research Methods, Evidence, and Impact and of Medicine<br/>         Vernooij, Robin W.M. ; Netherlands Comprehensive Cancer Organisation (IKNL), 14. Department of Research<br/>         Akl, Elie; American University of Beirut; American University of Beirut, Department of Internal Medicine</p> |
| <b>Primary Subject Heading</b>: | Evidence based practice                                                                                                                                                                                                                                                                                                                                                                                                                                                                                                                                                                                                                                                                                                                                                                                                                                                                                                                                                                                                                                                                                                                                                                                                                                                                                                                                                                                                                                                                                                                                                                                              |
| Secondary Subject Heading:      | Research methods                                                                                                                                                                                                                                                                                                                                                                                                                                                                                                                                                                                                                                                                                                                                                                                                                                                                                                                                                                                                                                                                                                                                                                                                                                                                                                                                                                                                                                                                                                                                                                                                     |
| Keywords:                       | Evidence-based medicine, guideline adaptation, guidelines as topic, practice guideline, quality, reporting standards                                                                                                                                                                                                                                                                                                                                                                                                                                                                                                                                                                                                                                                                                                                                                                                                                                                                                                                                                                                                                                                                                                                                                                                                                                                                                                                                                                                                                                                                                                 |
|                                 |                                                                                                                                                                                                                                                                                                                                                                                                                                                                                                                                                                                                                                                                                                                                                                                                                                                                                                                                                                                                                                                                                                                                                                                                                                                                                                                                                                                                                                                                                                                                                                                                                      |

1  
2  
3  
4  
5  
6  
7  
8  
9  
10  
11  
12  
13  
14  
15  
16  
17  
18  
19  
20  
21  
22  
23  
24  
25  
26  
27  
28  
29  
30  
31  
32  
33  
34  
35  
36  
37  
38  
39  
40  
41  
42  
43  
44  
45  
46  
47  
48  
49  
50  
51  
52  
53  
54  
55  
56  
57  
58  
59  
60

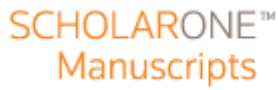

# Extending the RIGHT statement for Reporting Adapted Practice Guidelines in Health Care: the RIGHT-Ad@pt Checklist protocol

## *Authors*

Yang Song<sup>1</sup>, Andrea J Darzi<sup>2</sup>, Mónica Ballesteros<sup>3</sup>, Laura Martínez García<sup>1,4\*</sup>, Pablo Alonso-Coello<sup>1,4,5</sup>, Thurayya Arayssi<sup>6</sup>, Soumyadeep Bhaumik<sup>7</sup>, Yaolong Chen<sup>8,9</sup>, Francoise Cluzeau<sup>10</sup>, Davina Gherzi<sup>11</sup>, Paulina Fuentes Padilla<sup>12</sup>, Étienne V Langlois<sup>13</sup>, Holger J Schünemann<sup>5</sup>, Robin WM Vernooij<sup>14</sup>, Elie A Akl<sup>2,5,15\*</sup>

## *Author affiliations*

1. Iberoamerican Cochrane Centre - Biomedical Research Institute Sant Pau (IIB Sant Pau), Barcelona, Spain
2. AUB GRADE Center, American University of Beirut, Lebanon
3. Hospital Universitario Vall d'Hebron, Barcelona, Spain
4. CIBER de Epidemiología y Salud Pública (CIBERESP), Spain
5. Department of Health Research Methods, Evidence, and Impact, McMaster GRADE center, McMaster University, Canada
6. Weill Cornell Medicine-Qatar, Qatar
7. The George Institute for Global Health, India
8. Evidence-Based Medicine Center, School of Basic Medical Sciences, Lanzhou University, Lanzhou, China
9. WHO Collaborating Centre for Guideline Implementation and Knowledge Translation
10. School of Public Health, Faculty of Medicine, Imperial College London, UK
11. National Health and Medical Research Council, Australia
12. Facultad de Medicina y Odontología, Universidad de Antofagasta, Chile
13. Alliance for Health Policy and Systems Research, World Health Organization
14. Department of Research, Netherlands Comprehensive Cancer Organisation (IKNL), Utrecht, Netherlands
15. Department of Internal Medicine, American University of Beirut, Lebanon

### ***Author Email Address***

1  
2  
3  
4  
5 Yang Song [yangsong@cochrane.es](mailto:yangsong@cochrane.es)  
6  
7 Andrea J Darzi [andreajdarzi@gmail.com](mailto:andreajdarzi@gmail.com)  
8  
9 Mónica Ballesteros [mopbasilva2015@gmail.com](mailto:mopbasilva2015@gmail.com)  
10  
11 Laura Martínez García\* [laura.martinez.garcia@cochrane.es](mailto:laura.martinez.garcia@cochrane.es)  
12  
13 Pablo Alonso-Coello [PAlonso@santpau.cat](mailto:PAlonso@santpau.cat)  
14  
15 Thurayya Arayssi [tha2002@qatar-med.cornell.edu](mailto:tha2002@qatar-med.cornell.edu)  
16  
17 Soumyadeep Bhaumik [drsoumyadeepbhaumik@gmail.com](mailto:drsoumyadeepbhaumik@gmail.com)  
18  
19 Yaolong Chen [chenaolong@lzu.edu.cn](mailto:chenaolong@lzu.edu.cn)  
20  
21 Francoise Cluzeau [f.cluzeau@imperial.ac.uk](mailto:f.cluzeau@imperial.ac.uk)  
22  
23 Davina Gherzi [Davina.Gherzi@nhmrc.gov.au](mailto:Davina.Gherzi@nhmrc.gov.au)  
24  
25 Paulina Fuentes Padilla [paulinafuentespadilla@yahoo.com](mailto:paulinafuentespadilla@yahoo.com)  
26  
27 Étienne V Langlois [langloise@who.int](mailto:langloise@who.int)  
28  
29 Holger J Schünemann [schuneh@mcmaster.ca](mailto:schuneh@mcmaster.ca)  
30  
31 Robin WM Vernooij [robinvernooij@gmail.com](mailto:robinvernooij@gmail.com)  
32  
33 Elie A Akl\* [ea32@aub.edu.lb](mailto:ea32@aub.edu.lb)  
34

### ***\*Corresponding authors***

#### **Elie A. Akl**

ea32@aub.edu.lb

Department of Internal Medicine, American University of Beirut, Beirut, Lebanon

#### **Laura Martínez García**

laura.martinez.garcia@cochrane.es

Iberoamerican Cochrane Centre - Biomedical Research Institute Sant Pau (IIB Sant Pau),

Barcelona, Spain



## ***Abstract***

### **Introduction**

The adaptation of guidelines is an increasingly used methodology for the efficient development of contextualised recommendations. Nevertheless, there is no specific reporting guidance. The Essential Reporting Items of Practice Guidelines in Healthcare (RIGHT) statement could be useful for reporting adapted guidelines, but it does not address all the important aspects of the adaptation process. The objective of our project is to develop an extension of the RIGHT statement for the reporting of adapted guidelines (RIGHT-Ad@pt Checklist).

### **Methods and analysis**

To develop the RIGHT-Ad@pt Checklist, we will use a multistep process that includes: 1) establishment of a Working Group; 2) generation of an initial checklist based on the RIGHT statement; 3) optimisation of the checklist (an initial assessment of adapted guidelines, semi-structured interviews, a Delphi consensus survey, an external review by guideline developers and users, and a final assessment of adapted guidelines); and 4) approval of the final checklist. At each step of the process, we will calculate absolute frequencies and proportions, use content analysis to summarise and draw conclusions, discuss the results, draft a report, and refine the checklist.

### **Ethics and dissemination**

We have obtained a waiver of approval from the Clinical Research Ethics Committee at the Hospital de la Santa Creu i Sant Pau (Barcelona, Spain). We will disseminate the RIGHT-Ad@pt checklist by publishing into a peer-reviewed journal, presenting to relevant stakeholders, and translating into different languages. We will continuously seek feedback from stakeholders, surveil new relevant evidence and, if necessary, update the checklist.

1  
2  
3 **Keywords**

4 Evidence-based medicine, guideline adaptation, guidelines as topic, practice guideline, quality,  
5 reporting standards.  
6  
7  
8  
9

10 **Word count**

11  
12 Abstract 241/300  
13  
14 Manuscript (Introduction - Discussion) 3520/4000  
15  
16  
17  
18  
19  
20  
21  
22  
23  
24  
25  
26  
27  
28  
29  
30  
31  
32  
33  
34  
35  
36  
37  
38  
39  
40  
41  
42  
43  
44  
45  
46  
47  
48  
49  
50  
51  
52  
53  
54  
55  
56  
57  
58  
59  
60

For peer review only

## ***Strengths and Limitations***

- There is no current tool for reporting adapted guidelines. The RIGHT-Ad@pt checklist will fill this gap and provide a clear guidance for the reporting of guideline adaptation.
- To develop the checklist, we will use the best available methodological research evidence, adopt a systematic and rigorous multistep process, and collect and build on the views and experiences of international stakeholders including guidelines methodologists, policy makers, journal editors, and guideline users.
- The RIGHT-Ad@pt checklist can be used within guideline adaptation to guide reporting, to improve the completeness of reporting, to evaluate publications, and to inform implementation decisions of health care.
- We will not conduct a complete formal validation of the checklist since our current process will not include an assessment of neither construction nor criterion validity

## Introduction

The World Health Organization (WHO) defines guidelines as “systematically developed evidence-based statements which assist providers, recipients and other stakeholders to make informed decisions about appropriate health interventions”. Guidelines have been increasingly used to provide guidance for policies or public health interventions, changes in resource availability or access to services based on evidence [1]. There is evidence that the methodological quality of guidelines has slowly improved over the last decades [2-4]. However, most guideline developers do not have enough resources for developing high-quality *de novo* guidelines [5]. Most low- and middle-income countries still do not have formal organisations, technical capacity or collaborations to develop evidence-based guidelines [6]. When guidelines are developed in those settings, their quality is typically poor [7-13]. Adapting published high-quality evidence-informed guidelines becomes a more efficient option [14-16].

Adaption of guidelines means the use of existing trustworthy guidelines, with (adapt) or without (adopt) modifications, to provide local, regional, or national guidance [15-17]. Schünemann et al. defined adapted recommendations as recommendations with: 1) potential change in the specific population, intervention, or comparator with respect to the original recommendations; 2) potential change in the certainty of the evidence; and 3) information on “conditions”, monitoring, implementation, and implications for research [16]. Adopted recommendations were defined as recommendations with: 1) the same specific population, intervention, and comparators as the original recommendations; 2) the same certainty of the evidence; and 3) information on implementation [16]. Adaptation of guidelines is an increasingly used methodology for the efficient development of contextualised recommendations that are relevant for diverse health systems [16-18]. Guideline adaptation takes into consideration local contextual factors such as language, availability and accessibility of services and resources, the health-care setting, and the relevant stakeholders’ cultural and ethical values [19]. At the same time, it should be based on similar systematic and transparent approaches as the source guideline in order to benefit from its quality and validity [20]. However, adaptation is not always possible. For example, when a trustworthy guideline is not available, a *de novo* guideline development process needs to be considered [16, 21].

Despite the increasing need, there is no standard adaptation method implemented internationally [21, 22]. A systematic review of the literature identified eight published frameworks for adaptation of clinical, public health or health system guidelines, concluding

1  
2  
3 that the “adaptation” phases of the processes were notably different [23]. Moreover, the  
4 process for adapting guidelines was usually poorly reported, including WHO guidelines [24].  
5 For example, Godah et al. 2016 systematically assessed the processes employed in the  
6 adaptation of WHO guidelines for human immunodeficiency virus (HIV) and tuberculosis (TB).  
7 Out of 170 eligible adapted guidelines, only 32 (32/170, 19%) reported the methods used in  
8 the adaptation process [24]. Similarly, Abdul-Khalek et al. 2017 assessed the methods used for  
9 adapting health-related guidelines published in peer-reviewed journals [25]. Out of the 72  
10 included adapted guidelines, 57 reported some degree of detail about the adaptation method  
11 used, and only 23 (23/57, 40%) reported using a specific adaptation method. These findings  
12 call for a need to optimize the methods used in guideline adaptation, and to improve the  
13 reporting of the adaptation process in adapted guidelines [24].  
14  
15  
16  
17  
18  
19  
20  
21  
22

23 Guidelines for reporting health research have been developed to enhance the accurate,  
24 complete, and transparent reporting of health research publications ([http://www.equator-](http://www.equator-network.org/)  
25 [network.org/](http://www.equator-network.org/)). Moher et al. 2010 defined a reporting guideline as “a checklist, flow diagram, or  
26 explicit text to guide authors in reporting a specific type of research, developed using explicit  
27 methodology” [26]. Its aim is to indicate the minimum reporting standards, for readers to  
28 comprehend the design, conduct, analysis and interpretation of a study, and to assess the  
29 validity of results [26, 27]. A transparent reporting approach could help guideline developers  
30 frame the decision making during the development process, and guideline users about the  
31 suitability for adapting, and consequently the adaptation process.  
32  
33  
34  
35  
36  
37  
38  
39

40 Currently, the main tools available for the reporting of guidelines development are: 1) the  
41 Appraisal of Guidelines for Research and Evaluation II (AGREE II) instrument, including the  
42 AGREE Reporting Checklist [28]; and 2) the Reporting Items for practice Guidelines in  
43 Healthcare (RIGHT) statement to improve the reporting of guidelines [29]. The RIGHT  
44 statement was formally developed as a reporting checklist for *de novo* guidelines [29].  
45 Although it could be useful for the reporting of adapted guidelines [30], it does not cover some  
46 of the steps that are specific to guidelines adaptation (e.g. description of methods used to  
47 search and identify guidelines) [29]. Therefore, to ensure rigour, transparency, clarity, and  
48 reproducibility of reporting the adaptation process, we will develop an extension of the RIGHT  
49 statement for the reporting of adapted guidelines.  
50  
51  
52  
53  
54  
55  
56  
57  
58  
59  
60

## **Objective**

To develop the RIGHT-Ad@pt Checklist, as an extension of the RIGHT statement tailored to adapted guidelines.

## **Methods and analysis**

To develop the checklist, we will build on the RIGHT statement [29], review methodology research evidence on guidelines adaptation [23-25], and adopt a multistep process we have successfully implemented in the development of similar tools [31, 32]. Table 1 describes the multistep development process of the RIGHT-Ad@pt Checklist, which includes: 1) establishment of a Working Group; 2) generation of an initial checklist; 3) optimisation of the checklist (an initial assessment of adapted guidelines, semi-structured interviews, a Delphi consensus survey, an external review by guideline developers and users, and a final assessment of adapted guidelines); and 4) approval of the final checklist. Figure 1 illustrates the development process, and Figure 2 presents the timeline.

### **1. Establishment of the RIGHT-Ad@pt Working Group**

The RIGHT-Ad@pt Working Group will include: 1) a Coordination Team; 2) an Advisory Group; and 3) a Delphi Panel [26, 31, 32].

#### **1.1. Coordination Team**

The Coordination Team (YS, MB, LMG, PAC, EA) will lead and coordinate the RIGHT-Ad@pt development process and ensure its completion according to the established timeline. Specifically, the Coordination Team will be responsible for 1) generating the initial version of the checklist; 2) implementing each step of the process; and 3) reporting the findings of each step of the processes. We have collected the Conflicts of interests (ColIs) of all members of the Coordination Team (Supplement File 1).

#### **1.2. Advisory Group**

The Advisory Group is a multidisciplinary group (8 to 10 people) including 1) guideline methodological experts (defined as having experience and expertise in guideline methods); 2) guidelines developers (defined as having participated in guideline development groups and/or guideline adaptation groups at least once in the past year); 3) guideline users (defined as healthcare professionals that use guidelines on a regular basis); and 4) journal editors of guideline related journals [26]. Members of the Advisory Group will review and provide expert

1  
2  
3 advice during the different steps of the RIGHT-Ad@pt development process. The Advisory  
4 Group will approve the final checklist and accompanying guidance. We have collected the CoIs  
5 of all members of the Advisory Group (Supplement File 1).  
6  
7  
8  
9

### 10 **1.3. Delphi Panel**

11 The Delphi Panel will be comprised of 20 to 30 members, with profiles similar to those of the  
12 members of the Advisory Group (guideline methodological experts, guidelines developers,  
13 guideline users, and journal editors of guideline related journals) [33, 34]. We will aim for  
14 country income, gender and profile representativeness of participants. We will identify  
15 participants from the Guidelines International Network (GIN) Adaptation Guidelines Working  
16 Group (<http://www.g-i-n.net/working-groups/adaptation>), WHO, authors of adapted  
17 guidelines [25], and expert colleagues. The panel's CoIs will be collected.  
18  
19  
20  
21  
22  
23  
24

## 25 **2. Generation of the initial checklist**

26 The Coordination Team will generate the initial version of the checklist building on the RIGHT  
27 statement [29]. We will conduct this step via monthly face-to-face and online meetings within  
28 the Coordination Team. The Coordination Team will review the results, draft a report with a  
29 proposal of the initial version for the Advisory Group to review, and produce a final version  
30 taken into consideration their feedback.  
31  
32  
33  
34  
35  
36

## 37 **3. Optimisation of the checklist**

### 38 **3.1. Initial assessment of adapted guidelines**

39 We will survey published adapted guidelines using initial checklist. We will explore the  
40 adequacy of each item (defined as overall completeness of reporting as well as the quantity of  
41 example supporting the item [35]), and refine the checklist. We will also record the main  
42 characteristics of the adapted guidelines (e.g. title, year, or adaptation process), completeness  
43 of reporting process for adapting guidelines, and suggestions to improve the checklist (Table 2).  
44  
45  
46  
47  
48  
49

50 We will assess a convenience sample of ten adapted guidelines available in English and  
51 published in the last five years [36]. We will also take into account country income level, type  
52 of organisation, and region. Two reviewers from the Coordination Team will independently  
53 apply the initial version of the checklist to adapted guidelines. The two reviewers will resolve  
54 potential disagreements by discussion, and if necessary, by consulting a third reviewer.  
55  
56  
57  
58  
59  
60

1  
2  
3 For quantitative variables (characteristics of adapted guidelines, completeness of reporting,  
4 and adequacy), we will calculate absolute frequencies and proportions. For qualitative  
5 variables (suggestions to improve the checklist), we will use content analysis to summarise and  
6 draw conclusions [37]. The Coordination Team will review the results, draft a report, review  
7 and agree on the relevant checklist modifications. If members of the Coordination Team do  
8 not reach consensus on specific items, they will consult the Advisory Group.  
9  
10  
11  
12

### 13 14 15 **3.2. Semi-structure interviews**

16 We will survey guideline developers who were involved in guideline adaptation over the past  
17 three years. We will explore participants' views and experiences on guidelines adaptation, and  
18 refine the checklist. We will also record the characteristics of participants and their  
19 workplaces, participants' understanding of each item, suggestions to improve the checklist,  
20 and participants' overall assessment of the checklist (Table 2). Each interview will last  
21 approximately one hour and will be recorded and transcribed with participant's permission.  
22 The interview transcripts will be sent to interviewees for approval.  
23  
24  
25  
26  
27  
28  
29

30 We will identify the participants with the support of the Advisory Group. We will contact via  
31 email and conduct online interviews. We will continue recruitment and collect data until  
32 information becomes repetitive and no new information emerges (sampling saturation) [38,  
33 39].  
34  
35  
36  
37

38 For quantitative variables (characteristics of participants and workplaces, participants'  
39 understanding of each item, and participants' overall assessment of the checklist), we will  
40 calculate absolute frequencies and proportions. For qualitative variables (participants' views  
41 and experiences, and suggestions to improve the checklist), we will use content analysis to  
42 summarise and draw conclusions [37]. The Coordination Team will review the results, draft a  
43 report, review and agree on the relevant checklist modifications. If members of the  
44 Coordination Team do not reach consensus on specific items, they will consult the Advisory  
45 Group.  
46  
47  
48  
49  
50  
51  
52

### 53 **3.3. Delphi consensus survey**

54 We will conduct a Delphi consensus survey to reach a consensus with the Delphi Panel about  
55 the included items in the checklist. We will also record response rate, characteristics of  
56 participants and workplaces, participants' understanding of each item, suggestions to improve  
57 the checklist, and participants' overall assessment of the checklist (Table 2).  
58  
59  
60



1  
2  
3  
4  
5 Before the first Delphi round, we will provide the Delphi Panel Members with a brief  
6 background material on the topic. In the first Delphi round, we will ask participants to rate  
7 whether each item should be included in the checklist using a seven-point Likert scale  
8 (1=strongly disagree and 7=strongly agree) [31, 32, 40]. We will calculate the median score for  
9 inclusion of each item and will classify them as 1) excluded (median score of 1-3 points); 2)  
10 review, modify and retest (median score of 4-5 points or with substantial comments); and 3)  
11 included (median score of 6 to 7 points and without substantial comments) [31, 32]. After each  
12 Delphi round, we will provide feedback to Delphi Panel Members (data reported will be  
13 anonymised). We will conduct additional Delphi rounds until consensus regarding items  
14 inclusion is reached (median score of 6-7) and no more relevant comments on the items are  
15 provided (two or three rounds, as needed). We will use online software to design the survey  
16 and collect responses (<http://www.clinapsis.com/>). We will not invite non-responders or  
17 partial responders (questionnaires with no response for more than 20% of the items) to  
18 subsequent Delphi rounds.  
19  
20  
21  
22  
23  
24  
25  
26  
27  
28  
29

30 For quantitative variables (response rate, characteristics of participants and workplaces,  
31 inclusion score, participants' understanding of each item, and participants' overall assessment  
32 of the checklist), we will calculate absolute frequencies and proportions. For qualitative data  
33 (suggestions to improve the checklist), we will use content analysis to summarise and draw  
34 conclusions [37]. We will not consider questionnaires with no response for more than 20% of  
35 the items. The Coordination Team will review the results of the Delphi consensus survey, draft  
36 a report with a proposal for the Advisory Group to review, and produce a final version taken  
37 into consideration their feedback.  
38  
39  
40  
41  
42  
43  
44

### 45 **3.4. External review**

#### 46 **3.4.1. External review by guidelines developers**

47 We will survey guideline developers who were involved in guideline adaptation over the past  
48 three years. We will explore usefulness of each item (defined as provision of enough and clear  
49 information in order to be used with effectiveness, efficiency and satisfaction to check the  
50 reporting of adapted guidelines [41]) using a seven-point Likert scale (1=strongly disagree and  
51 7=strongly agree) [40], and refine the checklist. We will also record response rate,  
52 characteristics of participants and workplaces, participants' understanding of each item,  
53 suggestions to improve the checklist, and participants' overall assessment of the checklist  
54 (Table 2).  
55  
56  
57  
58  
59  
60

1  
2  
3  
4  
5 We will identify participants by contacting professionals associated with the GIN community  
6 (<http://www.g-i-n.net>) and WHO. We will use online software to design the survey and collect  
7 responses (<http://www.clinapsis.com/>).  
8  
9

10  
11 For quantitative variables (response rate, characteristics of participants and workplaces,  
12 usefulness score, participants' understanding of each item, and participants' overall  
13 assessment of the checklist), we will calculate absolute frequencies and proportions. For  
14 qualitative data (suggestions to improve the checklist), we will use content analysis to  
15 summarise and draw conclusions [37]. We will not consider questionnaires with no response  
16 for more than 20% of the items.  
17  
18  
19  
20  
21

#### 22 23 **3.4.2. External review by guidelines users**

24 We will conduct external review semi-structured interviews with guidelines users who have  
25 used adapted guidelines over the past three years. We will explore participants' views and  
26 experiences using the checklist, and refine the checklist. We will also record the characteristics  
27 of participants and workplaces, participants' understanding of each item, suggestions to  
28 improve the checklist, and participants' overall assessment of the checklist (Table 2). Each  
29 interview will last approximately one hour and will be recorded and transcribed with  
30 participant's permission. The interview transcripts will be sent to interviewees for approval.  
31  
32  
33  
34  
35  
36  
37

38 We will identify the participants with the support of the Advisory Group. We will contact via  
39 email and conduct online interviews. We will continue recruitment and collect data until  
40 information becomes repetitive and no new information emerges (sampling saturation) [38,  
41 39].  
42  
43  
44  
45

46 For quantitative variables (characteristics of participants and workplaces, usefulness score,  
47 participants' understanding of each item, and participants' overall assessment of the checklist),  
48 we will calculate absolute frequencies and proportions. For qualitative data (participants'  
49 views and experiences, and suggestions to improve the checklist), we will use content analysis  
50 to summarise and draw conclusions [37]. The Coordination Team will review the results of the  
51 external review (guideline developers and users), draft a report with a proposal for the  
52 Advisory Group to review, and produce a final version taken into consideration their feedback.  
53  
54  
55  
56  
57  
58  
59  
60

### 3.5. Final assessment of adapted guidelines

We will conduct a final assessment of the validity of each item in a set of adapted guidelines. We will also record the main characteristics of the adapted guidelines (e.g. title, year, or adaptation process), completeness of reporting process for adapting guidelines, and suggestions to improve the checklist (Table 2).

We will assess a convenience sample of ten adapted guidelines available in English and published in the last five years [36]. We will also take into account country income level, type of organization, and region. Two reviewers from the Coordination Team will independently apply the final version of the checklist to adapted guidelines. The two reviewers will resolve potential disagreements by discussion, and if necessary, by consulting a third reviewer.

For quantitative variables (characteristics of adapted guidelines, completeness of reporting, and adequacy), we will calculate absolute frequencies and proportions. For qualitative variables (suggestions to improve the checklist), we will use content analysis to summarise and draw conclusions [37]. The Coordination Team will review the results, draft a report, review and agree on the relevant checklist modifications. If members of the Coordination Team do not reach consensus on specific items, they will consult the Advisory Group.

## 4. Approval of the final checklist

The Coordination Team will generate the final version of the checklist. The final checklist will highlight the changes from the RIGHT statement [29], including 1) the items that remained unchanged, 2) the items that were modified, 3) the items that were added as part of the extension, and 4) the items that were omitted. All members of the Coordination Team and the Advisory Group will need to review and approve the final version of the checklist through consensus discussion.

## Patient and Public Involvement

Patient and Public will not be involved in the study.

## *Discussion*

### Executive summary

The aim of this project is to develop the RIGHT-Ad@pt Checklist, as an extension of the RIGHT statement tailored for guideline adaptation, to improve the rigour and transparency of

1  
2  
3 guideline adaptation reporting. To develop the checklist, we will build on the RIGHT statement,  
4 use the best available evidence from published methodological research on this topic, and use  
5 a rigorous multistep process involving multiple stakeholders.  
6  
7  
8  
9

## 10 **Our study in the context of previous research**

11 Adaptation of high-quality guidelines is an alternative to developing *de novo* guidelines that  
12 saves both time and resources, and avoids duplication of effort. The ADAPTE framework is one  
13 of the earliest systematic approaches to adapt guidelines to local context [15, 42]. Building on  
14 work done for WHO in 2006, the "GRADE-ADOLOPMENT" framework proposed using the  
15 GRADE Evidence to Decision (EtD) frameworks for the adaptation, adoption, and *de novo*  
16 development of guidelines [16]. Despite these advances, there is variability in the quality of  
17 reporting of adapted practice guidelines and no guidance for their reporting is available [23,  
18 25]. The proposed checklist might help with reducing the variability of adaptation process and  
19 improving the quality of reporting. The checklist is not intended to support guideline  
20 development, which will be done through an extension of the GIN-McMaster Guideline  
21 Development Checklist [43].  
22  
23  
24  
25  
26  
27  
28  
29  
30  
31

## 32 **Strengths and Limitations**

33 Our proposal has some limitations. For example, we will only include guidelines published in  
34 English in the assessment of adapted guidelines. The checklist will inform about the  
35 completeness of the reporting but not necessarily about the quality of the adaptation process.  
36 We will not conduct a complete formal validation of the checklist since our current process will  
37 not include an assessment of neither construction nor criterion validity [44]; however, our  
38 proposed approach will ensure both face and content validity.  
39  
40  
41  
42  
43  
44  
45

46 Our proposal has several strengths. The development of the checklist will be comprehensive,  
47 including the use of previous methodological evidence [23-25, 29, 31, 32] and the engagement  
48 of the multidisciplinary international guideline community. We will collect views and  
49 experiences from different stakeholders, including methodologists, guideline developers,  
50 guidelines users and journal editors. We will also ensure the diversity of participants in terms  
51 of country level of income, gender, and field of expertise. This will allow us to incorporate the  
52 different stakeholders' perspective about the adaptation of guidelines. We will address the risk  
53 of bias in each step of the development process. To minimise interviewer bias, semistructured  
54 interviews will be conducted using an interview guide. To minimise selection bias, we will  
55  
56  
57  
58  
59  
60

1  
2  
3 invite all GIN Adaptation Guidelines Working Group members as well as other stakeholders to  
4 join the Delphi Panel and to participate in the external review survey. To minimise non-  
5 response bias, we will make the survey available online for four weeks and we will send two  
6 reminders prior to the round closing date.  
7  
8  
9

## 10 **Implications for practice and research**

11  
12 RIGHT-Ad@pt will help improve the completeness when reporting adapted guidelines,  
13 therefore contribute to improve their quality, and facilitate their implementation. The  
14 checklist will allow the guideline developers to guide their reporting, journals editors to  
15 improve the reporting of published adapted guidelines, policy makers to inform on  
16 implementation decisions, and guideline users to evaluate the completeness of the reporting  
17 within adapted guidelines. Future research should focus on the performance of a complete  
18 formal validation of the checklist and its assessment in a representative sample of  
19 contemporary adapted guidelines. Surveillance on the use of the checklist and assessment of  
20 its impact could also be a topic of research.  
21  
22  
23  
24  
25  
26  
27  
28  
29

## 30 **Ethics and Dissemination**

31  
32 The protocol obtained a waiver of approval (did not involve patients, biological samples, or  
33 clinical data) from the Clinical Research Ethics Committee at the Hospital de la Santa Creu i  
34 Sant Pau (Barcelona, Spain). Nevertheless, we will request written informed consent from all  
35 participants and anonymise all data.  
36  
37  
38

39 The dissemination activities will include: 1) publication of the RIGHT-Ad@pt Checklist in a peer-  
40 reviewed journal; 2) presentation the project to relevant stakeholders (e.g., via international  
41 conferences, electronic bulletins, related websites (<http://www.right-statement.org/>,  
42 <http://www.equator-network.org/>), and social media (e.g., Twitter); and 3) translation of the  
43 checklist into different languages. The implementation activities will include: 1) engaging with  
44 journal editors to encourage the use of the checklist; and 2) evaluation of the impact of the  
45 checklist on the reporting of adapted guidelines. Finally, we will continuously seek feedback  
46 from stakeholders, surveil new relevant evidence and, if necessary, update the checklist.  
47  
48  
49  
50  
51  
52  
53  
54  
55  
56  
57  
58  
59  
60

## ***List of abbreviations***

AGREE II: Appraisal of Guidelines for Research and Evaluation II; CoIs: Conflicts of interests; EtD: GRADE Evidence to Decision; GIN: Guidelines International Network; GRADE: The Grading of Recommendations Assessment, Development and Evaluation; HIV: Human immunodeficiency virus; RIGHT: Reporting Items of Practice Guidelines in Healthcare; RIGHT-Ad@pt: Extension of the RIGHT statement for Adapted Practice Guidelines; TB: Tuberculosis; WHO: World Health Organization.

## ***Declarations***

### **Authors' contributions**

Y.S., A.D., L.M.G, P.A-C., and E.A.A. wrote the first draft of the manuscript. Y.S., M. B., L.M.G, P.A-C., and E.A.A. form the coordination team and have day to day responsibility for the project. T.A., S.B., Y.L.C., F.C., D.G., P.F.P., E.V.L., H.J.S., and R.W.M.V. are independent advisors of the project and provide methodological contributions for the manuscript. All authors critically reviewed the manuscript and approved its final version.

### **Funding statement**

Y.S. is funded by China scholarship Council (No. 201707040103). L.M.G. is funded by a Miguel Servet contract from the Instituto de Salud Carlos III (CP18/00007). The funders had no role in the study design, data collection and analysis, interpretation of data, and writing the manuscript

### **Competing interests statement**

E.A.A. and H.J.S. have intellectual CoIs related to his contribution to the development of methods of guideline adaptation, the RIGHT statement, and methodological studies in the field. S.B. is Analyses Advisor for BMJ and Associate Editor at BMJ Global Health and BMC Systematic Reviews. Other members have clarified they do not have relevant conflicts.

### **Data availability statement**

The information of all participants is available in the Supplement File 1.

### **Acknowledgements**

The authors would like to thank Victoria Leo for her help in editing the final version of the manuscript.

## References

1. World Health Organization. WHO handbook for guideline development: WHO handbook for guideline development, 2014.
2. Alonso-Coello P, Irfan A, Sola I, Gich I, Delgado-Noguera M, Rigau D, et al. The quality of clinical practice guidelines over the last two decades: a systematic review of guideline appraisal studies. *Qual Saf Health Care*. 2010;19:e58.
3. Armstrong JJ, Goldfarb AM, Instrum RS, MacDermid JC. Improvement evident but still necessary in clinical practice guideline quality: a systematic review. *J Clin Epidemiol*. 2017;81:13-21.
4. Institute of Medicine: Clinical Practice Guideline We Can Trust. Washington, DC: The National Academies Press 2011.
5. Schünemann HJ, Fretheim A, Oxman AD. WHO Advisory Committee on Health Research. Improving the use of research evidence in guideline development: 1. Guidelines for guidelines. *Health Res Policy Syst*. 2006;4:13.
6. Bhaumik S. Use of evidence for clinical practice guideline development. *Trop Parasitol*. 2017;7(2):65-71.
7. Bhaumik S, Jagadesh S, Ellatar M, Kohli N, Riedha M, Moi M. Clinical practice guidelines in India: Quality appraisal and the use of evidence in their development. *J Evid Based Med*. 2018;11(1): 26-39.
8. Canelo-Aybar C, Balbin G, Perez-Gomez Á, Florez ID. Clinical practice guidelines in Peru: evaluation of its quality using the AGREE II instrument. *Rev Peru Med Exp Salud Publica*. 2016;33(4):732-738.
9. Kredo T, Gerritsen A, van Heerden J, Conway S, Siegfried N. Clinical practice guidelines within the Southern African Development Community: a descriptive study of the quality of guideline development and concordance with best evidence for five priority diseases. *Health Res Policy Syst*. 2012 5(10):1.
10. Machingaidze S, Zani B, Abrams A, Durao S, Louw Q, Kredo T, et al. Series: Clinical Epidemiology in South Africa. Paper 2: Quality and reporting standards of South African primary care clinical practice guidelines. *J Clin Epidemiol*. 2017;83:31-36.
11. Machingaidze S, Grimmer K, Louw Q, Kredo T, Young T, Volmink J. Next generation clinical guidance for primary care in South Africa - credible, consistent and pragmatic. *PLoS ONE*. 2018;13(3): e0195025.

12. Molino CG, Romano-Lieber NS, Ribeiro E, de Melo DO. Non-Communicable Disease Clinical Practice Guidelines in Brazil: A Systematic Assessment of Methodological Quality and Transparency. *PLoS One*. 2016;11(11):e0166367.
13. Talagala IA, Samarakoon Y, Senanayake S, Abeysena C. Sri Lankan clinical practice guidelines: A methodological quality assessment utilizing the AGREE II instrument. *J Eval Clin Pract*. 2018.
14. Fervers B, Burgers JS, Haugh MC, Latreille J, Mlika-Cabanne N, Paquet L, et al. Adaptation of clinical guidelines: literature review and proposition for a framework and procedure. *Int J Qual Health Care*. 2006;18(3): 167-176.
15. Fervers B, Burgers JS, Voellinger R, Brouwers M, Browman GP, Graham ID, et al. Guideline adaptation: an approach to enhance efficiency in guideline development and improve utilisation. *BMJ Qual Saf*. 2011;20(3):228-36.
16. Schünemann HJ, Wiercioch W, Brozek J, Etzeandia-Ikobaltzeta I, Mustafa RA, Manja V, et al. GRADE Evidence to Decision (EtD) frameworks for adoption, adaptation, and de novo development of trustworthy recommendations: GRADE-ADOLOPMENT. *J Clin Epidemiol*. 2017;81:101-110.
17. Darzi A, Harfouche M, Arayssi T, Alemadi S, Alnaqbi KA, Badsha H, et al. Adaptation of the 2015 American College of Rheumatology treatment guideline for rheumatoid arthritis for the Eastern Mediterranean Region: an exemplar of the GRADE Adolopment. *Health Qual Life Outcomes*. 2017;15: 183.
18. Okely AD, Ghersi D, Hesketh KD, Santos R, Loughran SP, Cliff DP, et al. A collaborative approach to adopting/adapting guidelines - The Australian 24-Hour Movement Guidelines for the early years (Birth to 5 years): an integration of physical activity, sedentary behavior, and sleep. *BMC Public Health*. 2017; 17(Suppl 5): 869.
19. Burgers JS, Anzueto A, Black PN, Cruz AA, Fervers B, Graham ID, et al. Adaptation, evaluation, and updating of guidelines: article 14 in Integrating and coordinating efforts in COPD guideline development. An official ATS/ERS workshop report. *Proc Am Thorac Soc*. 2012;9(5):304-10.
20. Kristiansen A, Brandt L, Agoritsas T, Akl EA, Berge E, Flem Jacobsen A, et al. Applying new strategies for the national adaptation, updating, and dissemination of trustworthy guidelines: results from the Norwegian adaptation of the Antithrombotic Therapy and the Prevention of Thrombosis, 9th Ed: American College of Chest Physicians Evidence-Based Clinical Practice Guidelines. *Chest*. 2014;146(3):735-61.
21. Mehndiratta A, Sharma S, Prakash N, Sankar J, Cluzeau F. Adapting clinical guidelines in India—a pragmatic approach. *BMJ*. 2017;359:j5147.



- 1
  - 2
  - 3
  - 4
  - 5
  - 6
  - 7
  - 8
  - 9
  - 10
  - 11
  - 12
  - 13
  - 14
  - 15
  - 16
  - 17
  - 18
  - 19
  - 20
  - 21
  - 22
  - 23
  - 24
  - 25
  - 26
  - 27
  - 28
  - 29
  - 30
  - 31
  - 32
  - 33
  - 34
  - 35
  - 36
  - 37
  - 38
  - 39
  - 40
  - 41
  - 42
  - 43
  - 44
  - 45
  - 46
  - 47
  - 48
  - 49
  - 50
  - 51
  - 52
  - 53
  - 54
  - 55
  - 56
  - 57
  - 58
  - 59
  - 60
22. Kredo T, Bernhardsson S, Machingaidze S, Young T, Louw Q, Ochodo E, et al. Guide to clinical practice guidelines: the current state of play. *Int J Qual Health Care*. 2016;28(1):122-8.
23. Darzi A, Abou-Jaoude EA, Agarwal A, Lakis C, Wiercioch W, Santesso N, et al. A methodological survey identified eight proposed frameworks for the adaptation of health related guidelines. *J Clin Epidemiol*. 2017; 86:3-10.
24. Godah MW, Abdul Khalek RA, Kilzar L, Zeid H, Nahlawi A, Lopes LC, et al. A very low number of national adaptations of the World Health Organization guidelines for HIV and tuberculosis reported their processes. *J Clin Epidemiol*. 2016; 80:50-56.
25. Abdul-Khalek RA, Darzi AJ, Godah MW, Kilzar L, Lakis C, Agarwal A, et al. Methods used in adaptation of health-related guidelines: A systematic survey. *J Glob Health*. 2017;7(2):020412.
26. Moher D, Schulz KF, Simera I, Altman DG. Guidance for Developers of Health Research Reporting Guidelines. *Plos Med*. 2010; 7(2):e1000217.
27. Liberati A, Altman DG, Tetzlaff J, Mulrow C, Gotzsche PC, Ioannidis JPA, et al. The PRISMA statement for reporting systematic reviews and meta-analyses of studies that evaluate healthcare interventions: explanation and elaboration. *Plos Med*. 2009;6(7):e1000100.
28. Brouwers MC, Kerkvliet K, Spithoff K; AGREE Next Steps Consortium. The AGREE Reporting Checklist: a tool to improve reporting of clinical practice guidelines. *BMJ*. 2016;352:1152.
29. Chen Y, Yang K, Marusic A, Qaseem A, Meerpohl JJ, Flottorp S, et al. A Reporting Tool for Practice Guidelines in Health Care: The RIGHT Statement. *Ann Intern Med*. 2017;166(2):128-32.
30. Tokalić R, Vidak M, Buljan I, Marusic A. Reporting quality of European and Croatian health practice guidelines according to the RIGHT reporting checklist. *Implement Sci*. 2018;13(1):135.
31. Vernooij RW, Alonso-Coello P, Brouwers M, Martínez García L; CheckUp Panel. Reporting Items for Updated Clinical Guidelines: Checklist for the Reporting of Updated Guidelines (CheckUp). *PLoS Med*. 2017;14(1):1002207.
32. Martínez García L, Pardo-Hernandez H, Niño de Guzman E, Superchi C, Ballesteros M, McFarlane E, et al. Development of a prioritisation tool for the updating of clinical guideline questions: the UpPriority Tool protocol. *BMJ Open*. 2017;7(8):e017226.
33. Akins RB, Tolson H, Cole BR. Stability of response characteristics of a Delphi panel: application of bootstrap data expansion. *BMC Med Res Methodol*. 2005;5:37.

- 1
- 2
- 3 34. Sinha IP, Smyth RL, Williamson PR. Using the Delphi technique to determine which
- 4 outcomes to measure in clinical trials: recommendations for the future based on a
- 5 systematic review of existing studies. *PLoS Med.* 2011;8(1):e1000393.
- 6
- 7
- 8 35. Glenton C, Carlsen B, Lewin S, Munthe-Kaas H, Colvin CJ, Tunçalp Ö, et al. Applying
- 9 GRADE-CERQual to qualitative evidence synthesis findings-paper 5: how to assess
- 10 adequacy of data. *Implement Sci.* 2018;13(Suppl 1):14.
- 11
- 12
- 13 36. Arain M, Campbell MJ, Cooper CL, Lancaster GA. What is a pilot or feasibility study? A
- 14 review of current practice and editorial policy. *BMC Med Res Methodol.* 2010;10:67.
- 15
- 16 37. Thomas J, Harden A. Methods for the thematic synthesis of qualitative research in
- 17 systematic reviews. *BMC Med Res Methodol.* 2008;8:45.
- 18
- 19 38. Grossoehme DH. Overview of qualitative research. *J Health Care Chaplain.* 2014;20:109-
- 20 22.
- 21
- 22
- 23 39. Guetterman TC. Descriptions of sampling practices within five approaches to qualitative
- 24 research in education and the health sciences. *Forum Qual Soc Res.* 2015;16:25.
- 25
- 26 40. Likert R. A technique for the measurement of attitudes. *Archives of psychology.* 1932.
- 27
- 28 41. Van der Weegen S, Verwey R, Tange HJ, et al. Usability testing of a monitoring and
- 29 feedback tool to stimulate physical activity. *Patient Prefer Adherence.* 2014;8: 311-22.
- 30
- 31 42. Schünemann HJ, Fretheim A, Oxman AD. Improving the use of research evidence in
- 32 guideline development: 13. Applicability, transferability and adaptation. *Health Res*
- 33 *Policy Syst.* 2006;4:25.
- 34
- 35 43. Schünemann HJ, Wiercioch W, Etxeandia I, Falavigna M, Santesso N, Mustafa R, et al.
- 36 Guidelines 2.0: systematic development of a comprehensive checklist for a successful
- 37 guideline enterprise. *CMAJ.* 2014;186(3):E123-42.
- 38
- 39 44. AGREE Collaboration. Development and validation of an international appraisal
- 40 instrument for assessing the quality of clinical practice guidelines: the AGREE project.
- 41 *Qual Saf Health Care.* 2003;12(1):18-23.
- 42
- 43
- 44
- 45
- 46
- 47
- 48
- 49
- 50
- 51
- 52
- 53
- 54
- 55
- 56
- 57
- 58
- 59
- 60

## Tables

**Table 1. Description of the multistep development process**

|                       | Establishment of the Working Group                                     | Generation of the initial checklist             | Optimisation of the checklist                        |                                                                          |                                                                                                           |                                                        |                                                        |                                                      | Approval of the final checklist               |
|-----------------------|------------------------------------------------------------------------|-------------------------------------------------|------------------------------------------------------|--------------------------------------------------------------------------|-----------------------------------------------------------------------------------------------------------|--------------------------------------------------------|--------------------------------------------------------|------------------------------------------------------|-----------------------------------------------|
|                       |                                                                        |                                                 | Initial assessment of adapted guidelines             | Semi-structured interviews                                               | Delphi consensus survey                                                                                   | External review by guidelines developers               | External review by guidelines users                    | Final assessment of adapted guidelines               |                                               |
| <b>Main objective</b> | To identify individuals who are relevant to participate in the project | To develop the initial version of the checklist | To assess the adequacy of each item of the checklist | To explore current practices in adaptation of guidelines                 | To define the list of items to be included in the checklist                                               | To assess the usefulness of each item of the checklist | To assess the usefulness of each item of the checklist | To assess the adequacy of each item of the checklist | To approve the final version of the checklist |
| <b>Study design</b>   | -                                                                      | -                                               | Methodological survey of adapted guidelines          | Semi-structured interviews                                               | Delphi consensus survey                                                                                   | Survey                                                 | Semi-structured interviews                             | Methodological survey of adapted guidelines          | -                                             |
| <b>Participants</b>   | - Coordination Team<br>- Advisory Group<br>- Delphi Panel Members      | - Coordination Team<br>- Advisory Group         | Coordination Team (two reviewers)                    | Guidelines developers                                                    | Delphi Panel Members                                                                                      | Guidelines developers                                  | Guidelines users                                       | Coordination Team (two reviewers)                    | - Coordination Team<br>- Advisory Group       |
| <b>Main outcome</b>   | -                                                                      | -                                               | Applicability rating of each item of the checklist   | Participants' views and experiences with process for adapting guidelines | Items considered relevant to report the adaptation of guidelines                                          | Usefulness rating of each item of the checklist        | Participants' views and experiences with the checklist | Applicability rating of each item of the checklist   | -                                             |
| <b>Study size</b>     | Convenience sample                                                     | -                                               | Convenience sample of 10 adapted guidelines          | Sampling saturation                                                      | 20-30 participants from G-I-N Adaptation Guidelines Working Group, WHO, and authors of adapted guidelines | G-I-N community                                        | Sampling saturation                                    | Convenience sample of 10 adapted guidelines          | -                                             |

Abbreviations: G-I-N, Guidelines International Network; WHO, World Health Organization.

1  
2  
3  
4  
5  
6  
7  
8  
9  
10  
11  
12  
13  
14  
15  
16  
17  
18  
19  
20  
21  
22  
23  
24  
25  
26  
27  
28  
29  
30  
31  
32  
33  
34  
35  
36  
37  
38  
39  
40  
41  
42  
43  
44  
45  
46

**Table 2. Research design steps relevant to the optimisation of the checklist and corresponding variables**

|                                                | Initial assessment of adapted guidelines | Semi-structured interviews           | Delphi consensus survey                           | External review                                    |                                       | Final assessment of adapted guidelines |
|------------------------------------------------|------------------------------------------|--------------------------------------|---------------------------------------------------|----------------------------------------------------|---------------------------------------|----------------------------------------|
|                                                |                                          |                                      |                                                   | Guidelines developers                              | Guidelines users                      |                                        |
| Response rate                                  |                                          |                                      | X                                                 | X                                                  |                                       |                                        |
| Characteristics of participants and workplaces |                                          | X                                    | X                                                 | X                                                  | X                                     |                                        |
| Characteristics of adapted guidelines          | X                                        |                                      |                                                   |                                                    |                                       | X                                      |
| Completeness of reporting                      | X                                        |                                      |                                                   |                                                    |                                       | X                                      |
| Participants' views and experiences            |                                          | XX                                   |                                                   |                                                    | XX                                    |                                        |
| Assessment of each item                        | XX<br>(adequacy and suggestions)         | X<br>(understanding and suggestions) | XX<br>(inclusion, understanding, and suggestions) | XX<br>(usefulness, understanding, and suggestions) | X<br>(understanding, and suggestions) | XX<br>(adequacy and suggestions)       |
| Overall assessment of the checklist            |                                          | X                                    | X                                                 | X                                                  | X                                     |                                        |

Notes: XX: Main outcome; X: Other outcomes

1  
2  
3 ***Figures***  
4

5 **Figure 1. Multistep development process of RIGHT-Ad@pt**  
6

7 **Figure 2. Timeline of RIGHT-Ad@pt**  
8  
9

10  
11 ***Supplement File***  
12

13 **Supplement File 1. Participants' information**  
14  
15  
16  
17  
18  
19  
20  
21  
22  
23  
24  
25  
26  
27  
28  
29  
30  
31  
32  
33  
34  
35  
36  
37  
38  
39  
40  
41  
42  
43  
44  
45  
46  
47  
48  
49  
50  
51  
52  
53  
54  
55  
56  
57  
58  
59  
60

For peer review only

1  
2  
3  
4  
5  
6  
7  
8  
9  
10  
11  
12  
13  
14  
15  
16  
17  
18  
19  
20  
21  
22  
23  
24  
25  
26  
27  
28  
29  
30  
31  
32  
33  
34  
35  
36  
37  
38  
39  
40  
41  
42  
43  
44  
45  
46  
47  
48  
49  
50  
51  
52  
53  
54  
55  
56  
57  
58  
59  
60

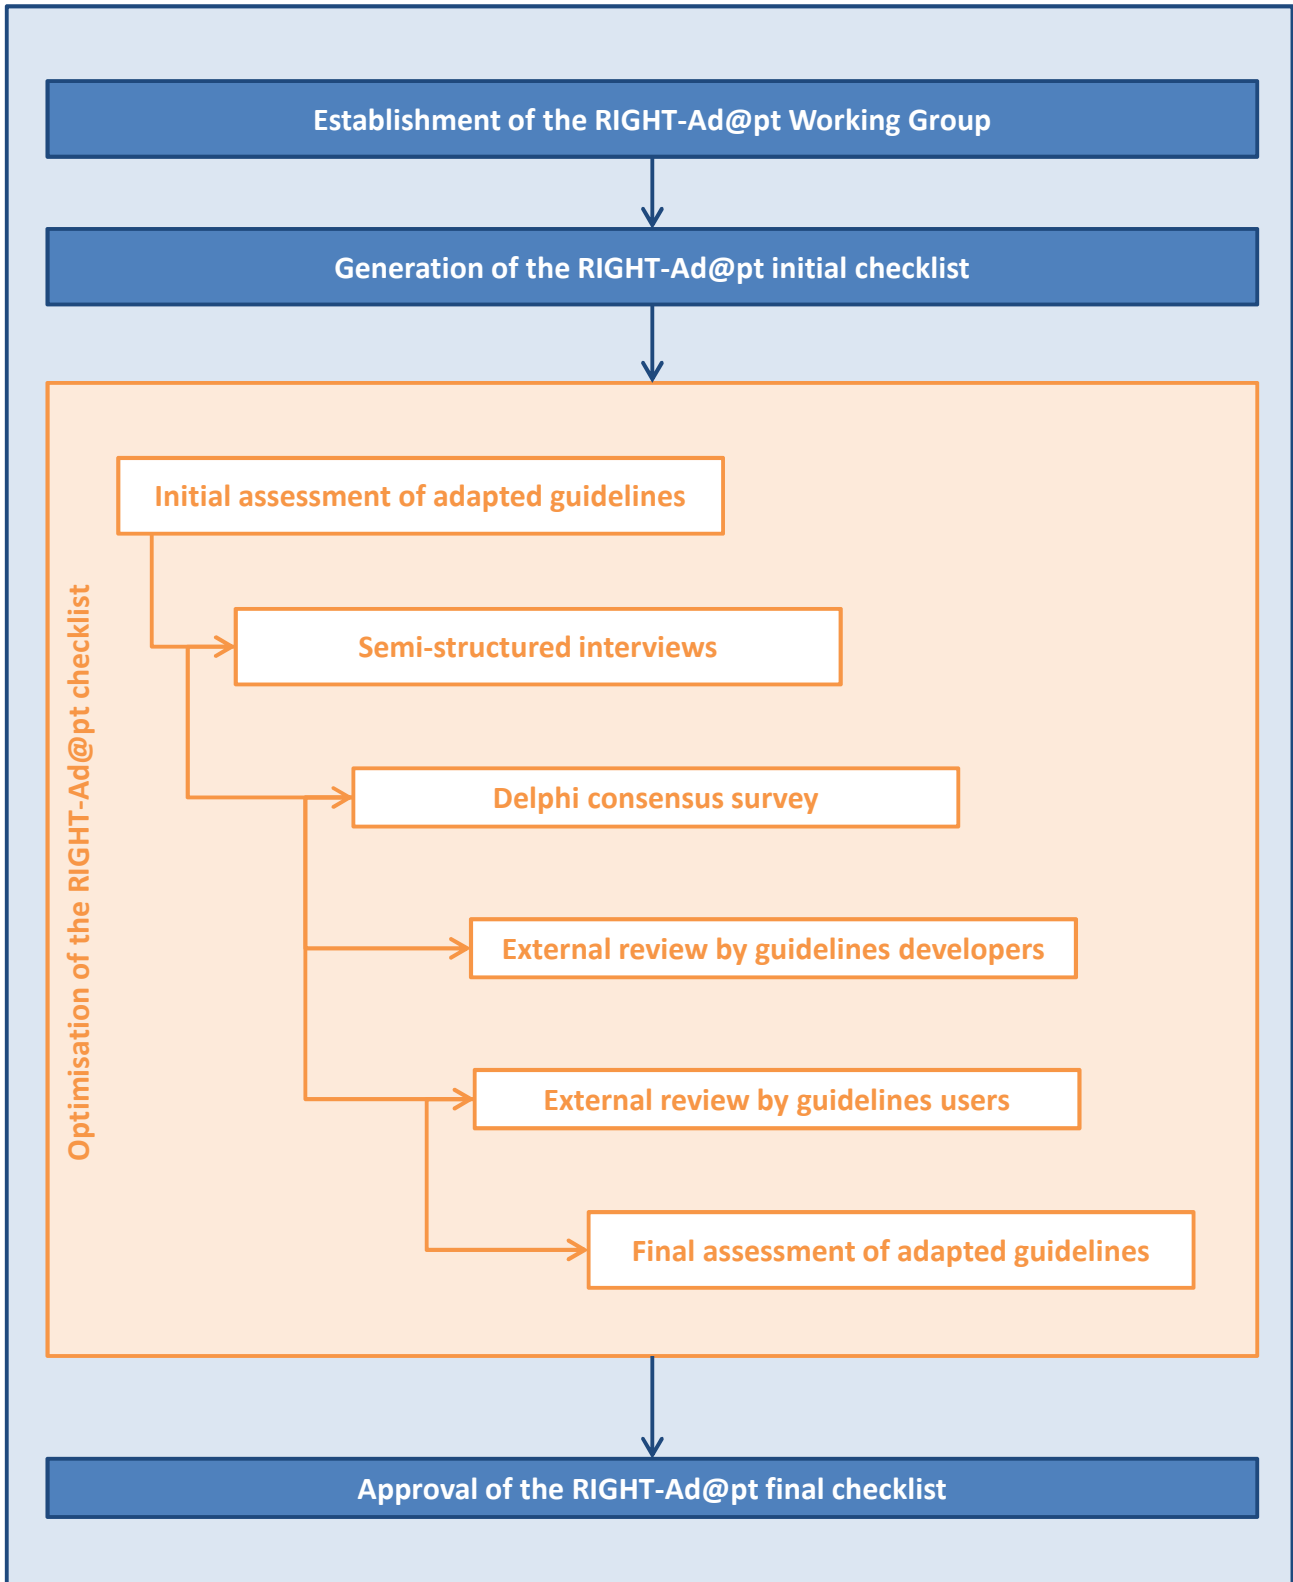

|                                  |                                               | 2018   |   |   |   |   |   |   |   |   |    |    |    | 2019   |    |    |    |    |    |    |    |    |    |    |    | 2020   |    |    |    |    |    |    |    |    |    |    |    |  |
|----------------------------------|-----------------------------------------------|--------|---|---|---|---|---|---|---|---|----|----|----|--------|----|----|----|----|----|----|----|----|----|----|----|--------|----|----|----|----|----|----|----|----|----|----|----|--|
|                                  |                                               | Year 1 |   |   |   |   |   |   |   |   |    |    |    | Year 2 |    |    |    |    |    |    |    |    |    |    |    | Year 3 |    |    |    |    |    |    |    |    |    |    |    |  |
| Months (1-12)                    |                                               | 1      | 2 | 3 | 4 | 5 | 6 | 7 | 8 | 9 | 10 | 11 | 12 | 1      | 2  | 3  | 4  | 5  | 6  | 7  | 8  | 9  | 10 | 11 | 12 | 1      | 2  | 3  | 4  | 5  | 6  | 7  | 8  | 9  | 10 | 11 | 12 |  |
| Months (1-36)                    |                                               | 1      | 2 | 3 | 4 | 5 | 6 | 7 | 8 | 9 | 10 | 11 | 12 | 13     | 14 | 15 | 16 | 17 | 18 | 19 | 20 | 21 | 22 | 23 | 24 | 25     | 26 | 27 | 28 | 29 | 30 | 31 | 32 | 33 | 34 | 35 | 36 |  |
| <b>The RIGHT-Ad@pt Checklist</b> |                                               |        |   |   |   |   |   |   |   |   |    |    |    |        |    |    |    |    |    |    |    |    |    |    |    |        |    |    |    |    |    |    |    |    |    |    |    |  |
| <b>1</b>                         | <b>Establishment of the Working Group</b>     |        |   |   |   |   |   |   |   |   |    |    |    |        |    |    |    |    |    |    |    |    |    |    |    |        |    |    |    |    |    |    |    |    |    |    |    |  |
| <b>2</b>                         | <b>Generation of the initial checklist</b>    |        |   |   |   |   |   |   |   |   |    |    |    |        |    |    |    |    |    |    |    |    |    |    |    |        |    |    |    |    |    |    |    |    |    |    |    |  |
| <b>3</b>                         | <b>Optimisation of the checklist</b>          |        |   |   |   |   |   |   |   |   |    |    |    |        |    |    |    |    |    |    |    |    |    |    |    |        |    |    |    |    |    |    |    |    |    |    |    |  |
|                                  | 3.1. Initial assessment of adapted guidelines |        |   |   |   |   |   |   |   |   |    |    |    |        |    |    |    |    |    |    |    |    |    |    |    |        |    |    |    |    |    |    |    |    |    |    |    |  |
|                                  | 3.2. Semi-structured interviews               |        |   |   |   |   |   |   |   |   |    |    |    |        |    |    |    |    |    |    |    |    |    |    |    |        |    |    |    |    |    |    |    |    |    |    |    |  |
|                                  | 3.3. Delphi consensus survey                  |        |   |   |   |   |   |   |   |   |    |    |    |        |    |    |    |    |    |    |    |    |    |    |    |        |    |    |    |    |    |    |    |    |    |    |    |  |
|                                  | 3.4. External review by guidelines developers |        |   |   |   |   |   |   |   |   |    |    |    |        |    |    |    |    |    |    |    |    |    |    |    |        |    |    |    |    |    |    |    |    |    |    |    |  |
|                                  | 3.5. External review by guidelines users      |        |   |   |   |   |   |   |   |   |    |    |    |        |    |    |    |    |    |    |    |    |    |    |    |        |    |    |    |    |    |    |    |    |    |    |    |  |
|                                  | 3.6. Final assessment of adapted guidelines   |        |   |   |   |   |   |   |   |   |    |    |    |        |    |    |    |    |    |    |    |    |    |    |    |        |    |    |    |    |    |    |    |    |    |    |    |  |
| <b>4</b>                         | <b>Approval of the final checklist</b>        |        |   |   |   |   |   |   |   |   |    |    |    |        |    |    |    |    |    |    |    |    |    |    |    |        |    |    |    |    |    |    |    |    |    |    |    |  |
| <b>Months (1-12)</b>             |                                               | 1      | 2 | 3 | 4 | 5 | 6 | 7 | 8 | 9 | 10 | 11 | 12 | 1      | 2  | 3  | 4  | 5  | 6  | 7  | 8  | 9  | 10 | 11 | 12 | 1      | 2  | 3  | 4  | 5  | 6  | 7  | 8  | 9  | 10 | 11 | 12 |  |
| <b>Months (1-36)</b>             |                                               | 1      | 2 | 3 | 4 | 5 | 6 | 7 | 8 | 9 | 10 | 11 | 12 | 13     | 14 | 15 | 16 | 17 | 18 | 19 | 20 | 21 | 22 | 23 | 24 | 25     | 26 | 27 | 28 | 29 | 30 | 31 | 32 | 33 | 34 | 35 | 36 |  |

## Extending the RIGHT statement for Reporting Adapted Practice Guidelines in Health Care: the RIGHT-Ad@pt Checklist protocol

### Supplement File 1. Participants' information

| Participants             | Member Role                                           | Organization                           | Country        | Income Level*       | Region*                    | Conflicts of Interests                                                                                                                                             |
|--------------------------|-------------------------------------------------------|----------------------------------------|----------------|---------------------|----------------------------|--------------------------------------------------------------------------------------------------------------------------------------------------------------------|
| <b>Coordination Team</b> |                                                       |                                        |                |                     |                            |                                                                                                                                                                    |
| <b>Participant 1</b>     | Guideline methodological expert, guidelines developer | American University of Beirut          | Lebanon        | Upper middle income | Middle East & North Africa | Intellectual CoIs related to the contribution to the development of methods of guideline adaptation, the RIGHT statement, and methodological studies in the field. |
| <b>Participant 2</b>     | Guideline methodological expert, guidelines developer | Iberoamerican Cochrane Centre          | Spain          | High income         | Europe & Central Asia      | None                                                                                                                                                               |
| <b>Participant 3</b>     | Guideline methodological expert, guidelines developer | Hospital Universitari Vall d'Hebron    | Spain          | High income         | Europe & Central Asia      | None                                                                                                                                                               |
| <b>Participant 4</b>     | Guideline methodological expert                       | Iberoamerican Cochrane Centre          | Spain          | High income         | Europe & Central Asia      | None                                                                                                                                                               |
| <b>Participant 5</b>     | Guideline methodological expert                       | Iberoamerican Cochrane Centre          | Spain          | High income         | Europe & Central Asia      | None                                                                                                                                                               |
| <b>Advisory Group</b>    |                                                       |                                        |                |                     |                            |                                                                                                                                                                    |
| <b>Participant 1</b>     | Guideline User                                        | Weill Cornell Medicine-Qatar           | Qatar          | High income         | Middle East & North Africa | None                                                                                                                                                               |
| <b>Participant 2</b>     | Journal Editor                                        | The George Institute for Global Health | India          | Lower middle income | South Asia                 | Analyses Advisor for BMJ and Associate Editor at BMJ Global Health and BMC Systematic Reviews.                                                                     |
| <b>Participant 3</b>     | Methodologist                                         | Lanzhou University                     | China          | Upper middle income | East Asia & Pacific        | None                                                                                                                                                               |
| <b>Participant 4</b>     | Guideline developer                                   | Imperial College London                | United Kingdom | High income         | Europe & Central Asia      | None                                                                                                                                                               |



|                       |                                                       |                                                                |             |             |                           |                                                                                                                                                                    |
|-----------------------|-------------------------------------------------------|----------------------------------------------------------------|-------------|-------------|---------------------------|--------------------------------------------------------------------------------------------------------------------------------------------------------------------|
| <b>Participant 5</b>  | Guideline developer                                   | National Health and Medical Research Council, Australia        | Australia   | High income | East Asia & Pacific       | None                                                                                                                                                               |
| <b>Participant 6</b>  | Guideline methodological expert, guideline user       | Facultad de Medicina y Odontología, Universidad de Antofagasta | Chile       | High income | Latin America & Caribbean | None                                                                                                                                                               |
| <b>Participant 7</b>  | Policy maker                                          | World Health Organisation                                      | Switzerland | High income | Europe & Central Asia     | None                                                                                                                                                               |
| <b>Participant 8</b>  | Policy maker                                          | World Health Organisation                                      | Switzerland | High income | Europe & Central Asia     | Oversee the quality of WHO guidelines as an employee of the World Health Organization. Member of the GRADE Working Group. Co-author of the RIGHT paper.            |
| <b>Participant 9</b>  | Guideline methodological expert, guidelines developer | McMaster University                                            | Canada      | High income | North America             | Intellectual CoIs related to the contribution to the development of methods of guideline adaptation, the RIGHT statement, and methodological studies in the field. |
| <b>Participant 10</b> | Guideline methodological expert                       | Netherlands Comprehensive Cancer Organisation                  | Netherlands | High income | Europe & Central Asia     | None                                                                                                                                                               |

\*Ref from World Bank: <https://datahelpdesk.worldbank.org/knowledgebase/articles/906519-world-bank-country-and-lending-groups>  
Abbreviation: CoIs: Conflicts of Interests.
