# Supplementary material for: Extending the RIGHT statement for reporting adapted practice guidelines in healthcare: the RIGHT-Ad@pt Checklist protocol
Source: PubMed Central journal article supplement — BMJ Open. 2019 Sep 24;9(9):e031767. doi: 10.1136/bmjopen-2019-031767 (PMC6773334; doi:10.1136/bmjopen-2019-031767), 2019-09-24
Supplement: bmjopen-2019-031767supp001.pdf [file bmjopen-2019-031767supp001.pdf]

## Extending the RIGHT statement for Reporting Adapted Practice Guidelines in Health Care: the RIGHT-Ad@pt Checklist protocol

### Supplement File 1. Participants' information

| Participants             | Member Role                                           | Organization                           | Country        | Income Level*       | Region*                    | Conflicts of Interests                                                                                                                                             |
|--------------------------|-------------------------------------------------------|----------------------------------------|----------------|---------------------|----------------------------|--------------------------------------------------------------------------------------------------------------------------------------------------------------------|
| <b>Coordination Team</b> |                                                       |                                        |                |                     |                            |                                                                                                                                                                    |
| <b>Participant 1</b>     | Guideline methodological expert, guidelines developer | American University of Beirut          | Lebanon        | Upper middle income | Middle East & North Africa | Intellectual CoIs related to the contribution to the development of methods of guideline adaptation, the RIGHT statement, and methodological studies in the field. |
| <b>Participant 2</b>     | Guideline methodological expert, guidelines developer | Iberoamerican Cochrane Centre          | Spain          | High income         | Europe & Central Asia      | None                                                                                                                                                               |
| <b>Participant 3</b>     | Guideline methodological expert, guidelines developer | Hospital Universitari Vall d'Hebron    | Spain          | High income         | Europe & Central Asia      | None                                                                                                                                                               |
| <b>Participant 4</b>     | Guideline methodological expert                       | Iberoamerican Cochrane Centre          | Spain          | High income         | Europe & Central Asia      | None                                                                                                                                                               |
| <b>Participant 5</b>     | Guideline methodological expert                       | Iberoamerican Cochrane Centre          | Spain          | High income         | Europe & Central Asia      | None                                                                                                                                                               |
| <b>Advisory Group</b>    |                                                       |                                        |                |                     |                            |                                                                                                                                                                    |
| <b>Participant 1</b>     | Guideline User                                        | Weill Cornell Medicine-Qatar           | Qatar          | High income         | Middle East & North Africa | None                                                                                                                                                               |
| <b>Participant 2</b>     | Journal Editor                                        | The George Institute for Global Health | India          | Lower middle income | South Asia                 | Analyses Advisor for BMJ and Associate Editor at BMJ Global Health and BMC Systematic Reviews.                                                                     |
| <b>Participant 3</b>     | Methodologist                                         | Lanzhou University                     | China          | Upper middle income | East Asia & Pacific        | None                                                                                                                                                               |
| <b>Participant 4</b>     | Guideline developer                                   | Imperial College London                | United Kingdom | High income         | Europe & Central Asia      | None                                                                                                                                                               |

|                       |                                                       |                                                                |             |             |                           |                                                                                                                                                                    |
|-----------------------|-------------------------------------------------------|----------------------------------------------------------------|-------------|-------------|---------------------------|--------------------------------------------------------------------------------------------------------------------------------------------------------------------|
| <b>Participant 5</b>  | Guideline developer                                   | National Health and Medical Research Council, Australia        | Australia   | High income | East Asia & Pacific       | None                                                                                                                                                               |
| <b>Participant 6</b>  | Guideline methodological expert, guideline user       | Facultad de Medicina y Odontología, Universidad de Antofagasta | Chile       | High income | Latin America & Caribbean | None                                                                                                                                                               |
| <b>Participant 7</b>  | Policy maker                                          | World Health Organisation                                      | Switzerland | High income | Europe & Central Asia     | None                                                                                                                                                               |
| <b>Participant 8</b>  | Policy maker                                          | World Health Organisation                                      | Switzerland | High income | Europe & Central Asia     | Oversee the quality of WHO guidelines as an employee of the World Health Organization. Member of the GRADE Working Group. Co-author of the RIGHT paper.            |
| <b>Participant 9</b>  | Guideline methodological expert, guidelines developer | McMaster University                                            | Canada      | High income | North America             | Intellectual Cols related to the contribution to the development of methods of guideline adaptation, the RIGHT statement, and methodological studies in the field. |
| <b>Participant 10</b> | Guideline methodological expert                       | Netherlands Comprehensive Cancer Organisation                  | Netherlands | High income | Europe & Central Asia     | None                                                                                                                                                               |

\*Ref from World Bank: <https://datahelpdesk.worldbank.org/knowledgebase/articles/906519-world-bank-country-and-lending-groups>

Abbreviation: Cols: Conflicts of Interests.
